# Supplementary material for: Molecular Recognition of Parallel G-quadruplex [d-(TTGGGGT)]4 Containing Tetrahymena Telomeric DNA Sequence by Anticancer Drug Daunomycin: NMR-Based Structure and Thermal Stability
Source: PubMed Central journal article supplement (PMC6225185; doi:10.3390/molecules23092266), 2018-09-05
Supplement: molecules-23-02266-s001.pdf [file molecules-23-02266-s001.pdf]

## Supplementary Information

### **Molecular Recognition of Parallel G-quadruplex [d-(TTGGGGT)]<sub>4</sub> containing *Tetrahymena* Telomeric Repeat by Anticancer Drug Daunomycin: NMR based Structure and Thermal Stability**

**Ritu Barthwal,\* Zia Tariq**

Department of Biotechnology, Indian Institute of Technology Roorkee, Roorkee 247667, India

\*Corresponding author

**Address for correspondence:**

Prof. Ritu Barthwal, Ph. D

Department of Biotechnology,

Indian Institute of Technology Roorkee,

Roorkee 247667, India.

E-mail: ritubfbs@iitr.ac.in, barthwalritu.iitr@gmail.com

Fax: +91-1332-273560; Phone: +91-1332-285807

## Tables

**Table S1 a)** <sup>1</sup>H Chemical shift (ppm) of DNA protons in daunomycin-[d-(TTGGGGT)]<sub>4</sub> complex ( $\delta_b$ ) at various Daunomycin (D)/ Nucleic acid (N) ratios, D/N, in KBPES buffer containing 100 mM KCl (90% H<sub>2</sub>O+10% D<sub>2</sub>O) at 25 °C.  $\Delta\delta$  refers to change in chemical shift due to binding.

| D/N                           | RESIDUES                      | T1         |                | T2         |                | G3         |                | G4         |                | G5         |                | G6         |                | T7         |                |
|-------------------------------|-------------------------------|------------|----------------|------------|----------------|------------|----------------|------------|----------------|------------|----------------|------------|----------------|------------|----------------|
|                               | PROTONS                       | $\delta_b$ | $\Delta\delta$ | $\delta_b$ | $\Delta\delta$ | $\delta_b$ | $\Delta\delta$ | $\delta_b$ | $\Delta\delta$ | $\delta_b$ | $\Delta\delta$ | $\delta_b$ | $\Delta\delta$ | $\delta_b$ | $\Delta\delta$ |
| 1.0                           | H8/H6                         | 7.57       | -0.02          | 7.53       | -0.01          | 8.12       | -0.02          | 7.78       | -0.02          | 7.79       | -0.05          | 7.72       | 0.01           | 7.59       | 0.25           |
|                               | H1'                           | 6.14       | 0.00           | 6.03       | 0.00           | 6.04       | -0.03          | 6.05       | -0.01          | 6.07       | -0.01          | 6.30       | 0.06           | 6.18       | 0.13           |
|                               | H2'                           | 2.21       | 0.00           | 2.26       | -0.01          | 2.64       | -0.02          | 2.65       | 0.01           | 2.71       | -0.01          | 2.26       | 0.00           | 2.28       | 0.11           |
|                               | H2''                          | 2.41       | -0.01          | 2.58       | -0.02          | 2.94       | -0.02          | 2.91       | -0.01          | 2.75       | -0.02          | 2.66       | -0.02          | 2.65       | 0.00           |
|                               | H3'                           | 4.62       | -0.03          | 4.91       | 0.01           | 5.04       | -0.02          | 5.06       | 0.01           | 5.06       | -0.03          | 5.08       | 0.04           | 5.03       | 0.07           |
|                               | H4'                           | 4.26       | -0.04          | 4.20       | 0.03           | 4.38       | -0.02          | 4.29       | -0.04          | 4.54       | -0.04          | 4.52       | -0.01          | 4.55       | 0.09           |
|                               | H5'                           | 4.08       | 0.01           | 4.06       | 0.00           | 4.14       | -0.01          | 4.28       | 0.00           | 4.36       | 0.00           | 4.23       | -0.02          | 4.15       | 0.02           |
|                               | H5''                          | 3.74       | -0.03          | 4.02       | -0.01          | 4.10       | -0.01          | 4.23       | 0.00           | 4.28       | -0.04          | 4.20       | -0.01          | 4.08       | 0.01           |
|                               | CH <sub>3</sub>               | 1.63       | -0.02          | 1.52       | -0.01          | -          | -              | -          | -              | -          | -              | -          | -              | 1.80       | 0.17           |
|                               | NH <sub>2</sub> <sup>b</sup>  | -          | -              | -          | -              | 9.81       | -0.03          | 9.10       | -0.07          | 9.09       | -0.08          | 7.46       | 0.00           | -          | -              |
|                               | NH <sub>2</sub> <sup>nb</sup> | -          | -              | -          | -              | 6.16       | -0.14          | 6.13       | -0.07          | 7.79       | -0.03          | 6.76       | 0.00           | -          | -              |
|                               | NH                            | -          | -              | -          | -              | 11.47      | -0.04          | 11.04      | -0.04          | 10.87      | -0.07          | 10.67      | -0.22          | -          | -              |
|                               | H8/H6                         | 7.57       | -0.02          | 7.54       | 0.00           | 8.11       | -0.03          | 7.77       | -0.03          | 7.77       | -0.07          | 7.72       | 0.01           | 7.64       | 0.30           |
|                               | H1'                           | 6.15       | 0.01           | 6.05       | 0.02           | 6.04       | -0.03          | 6.04       | -0.02          | 6.04       | -0.04          | 6.31       | 0.07           | 6.21       | 0.16           |
| H2'                           | 2.23                          | 0.02       | 2.24           | -0.03      | 2.63           | -0.03      | 2.66           | -0.02      | 2.70           | -0.02      | 2.31           | 0.05       | 2.30           | 0.13       |                |
| H2''                          | 2.44                          | 0.02       | 2.57           | -0.03      | 2.93           | -0.03      | 2.85           | -0.07      | 2.85           | 0.08       | 2.68           | 0.00       | 2.65           | 0.00       |                |
| H3'                           | 4.66                          | 0.01       | 4.92           | 0.02       | 5.04           | -0.02      | 5.07           | 0.02       | 5.07           | -0.02      | 5.08           | 0.04       | 5.06           | 0.10       |                |
| H4'                           | 4.25                          | -0.05      | 4.19           | 0.02       | 4.38           | -0.02      | 4.29           | -0.04      | -              | -          | 4.54           | 0.01       | 4.57           | 0.11       |                |
| H5'                           | 4.07                          | 0.00       | 4.06           | 0.00       | 4.15           | 0.00       | 4.28           | 0.00       | 4.36           | 0.00       | 4.24           | -0.01      | 4.16           | 0.03       |                |
| H5''                          | 3.76                          | -0.01      | 4.02           | -0.01      | 4.11           | 0.00       | 4.23           | 0.00       | 4.28           | -0.04      | 4.20           | -0.01      | 4.11           | 0.04       |                |
| CH <sub>3</sub>               | 1.61                          | -0.04      | 1.54           | 0.01       | -              | -          | -              | -          | -              | -          | -              | -          | 1.84           | 0.21       |                |
| NH <sub>2</sub> <sup>b</sup>  | -                             | -          | -              | -          | 9.78           | -0.06      | 9.08           | -0.09      | 9.09           | -0.08      | 7.47           | 0.01       | -              | -          |                |
| NH <sub>2</sub> <sup>nb</sup> | -                             | -          | -              | -          | 6.18           | -0.12      | 6.10           | -0.10      | 7.76           | -0.06      | 6.77           | 0.01       | -              | -          |                |
| NH                            | -                             | -          | -              | -          | 11.42          | -0.09      | 11.01          | -0.07      | 10.84          | -0.10      | 10.59          | -0.30      | -              | -          |                |

\* Negative sign in  $\Delta\delta$  indicates upfield shift.

**Table S1 b)** <sup>1</sup>H Chemical shift (ppm) of DNA protons in daunomycin-[d-(TTGGGGT)]<sub>4</sub> complex ( $\delta_b$ ) at various D/N ratios in KBPES buffer containing 100 mM KCl (90% H<sub>2</sub>O+10% D<sub>2</sub>O) at 25 °C.  $\Delta\delta$  refers to change in chemical shift due to binding.

| D/N | RESIDUES                      | T1         |                | T2         |                | G3         |                | G4         |                | G5         |                | G6         |                | T7         |                |
|-----|-------------------------------|------------|----------------|------------|----------------|------------|----------------|------------|----------------|------------|----------------|------------|----------------|------------|----------------|
|     | PROTONS                       | $\delta_b$ | $\Delta\delta$ | $\delta_b$ | $\Delta\delta$ | $\delta_b$ | $\Delta\delta$ | $\delta_b$ | $\Delta\delta$ | $\delta_b$ | $\Delta\delta$ | $\delta_b$ | $\Delta\delta$ | $\delta_b$ | $\Delta\delta$ |
| 3.0 | H8/H6                         | 7.57       | -0.02          | 7.54       | 0.00           | 8.09       | -0.05          | 7.75       | -0.05          | 7.75       | -0.09          | 7.70       | -0.01          | 7.64       | 0.30           |
|     | H1'                           | 6.17       | 0.03           | 6.06       | 0.03           | 6.04       | -0.03          | 6.04       | -0.02          | 6.04       | -0.04          | 6.29       | 0.05           | 6.21       | 0.16           |
|     | H2'                           | 2.23       | 0.02           | 2.24       | -0.03          | 2.62       | -0.04          | 2.67       | 0.03           | 2.71       | -0.01          | 2.36       | 0.10           | 2.31       | 0.14           |
|     | H2''                          | 2.47       | 0.05           | 2.56       | -0.04          | 2.91       | -0.05          | 2.91       | -0.01          | 2.76       | -0.01          | 2.66       | -0.02          | 2.63       | -0.02          |
|     | H3'                           | 4.66       | 0.01           | 4.92       | 0.02           | 5.04       | -0.02          | 5.05       | 0.00           | 5.05       | -0.04          | 5.08       | 0.04           | 5.07       | 0.11           |
|     | H4'                           | 4.26       | -0.04          | 4.17       | 0.00           | 4.37       | -0.03          | 4.29       | -0.04          | -          | -              | 4.54       | 0.01           | 4.56       | 0.10           |
|     | H5'                           | 4.08       | 0.01           | 4.07       | 0.01           | 4.13       | -0.02          | 4.28       | 0.00           | 4.36       | 0.00           | 4.25       | 0.00           | 4.15       | 0.02           |
|     | H5''                          | 3.76       | -0.01          | 4.03       | 0.00           | 4.10       | -0.01          | 4.23       | 0.00           | 4.28       | -0.04          | 4.21       | 0.00           | 4.10       | 0.03           |
|     | CH <sub>3</sub>               | 1.60       | -0.05          | 1.52       | -0.01          | -          | -              | -          | -              | -          | -              | -          | -              | 1.83       | 0.20           |
|     | NH <sub>2</sub> <sup>b</sup>  | -          | -              | -          | -              | 9.76       | -0.08          | 9.06       | -0.11          | 9.05       | -0.12          | 7.46       | 0.00           | -          | -              |
|     | NH <sub>2</sub> <sup>nb</sup> | -          | -              | -          | -              | 6.15       | -0.15          | 6.07       | -0.13          | 7.75       | -0.07          | 6.76       | 0.00           | -          | -              |
| NH  | -                             | -          | -              | -          | 11.37          | -0.14      | 10.98          | -0.10      | 10.82          | -0.12      | 10.55          | -0.34      | -              | -          |                |
| 4.0 | H8/H6                         | 7.57       | -0.02          | 7.54       | 0.00           | 8.08       | -0.06          | 7.74       | -0.06          | 7.74       | -0.10          | 7.69       | -0.02          | 7.64       | 0.30           |

|                               |      |       |      |       |       |       |       |       |       |       |       |       |      |       |
|-------------------------------|------|-------|------|-------|-------|-------|-------|-------|-------|-------|-------|-------|------|-------|
| H1'                           | 6.15 | 0.01  | 6.05 | 0.02  | 6.03  | -0.04 | 6.02  | -0.04 | 6.02  | -0.06 | 6.27  | 0.03  | 6.20 | 0.15  |
| H2'                           | 2.23 | 0.02  | 2.22 | -0.05 | 2.60  | -0.06 | 2.67  | 0.03  | 2.67  | -0.05 | 2.28  | 0.02  | 2.30 | 0.13  |
| H2''                          | 2.45 | 0.03  | 2.56 | -0.04 | 2.90  | -0.06 | 2.91  | -0.01 | 2.79  | 0.02  | 2.65  | -0.03 | 2.63 | -0.02 |
| H3'                           | 4.66 | 0.01  | 4.92 | 0.02  | 5.03  | -0.03 | 5.05  | 0.00  | 5.05  | -0.04 | 5.07  | 0.03  | 5.07 | 0.11  |
| H4'                           | 4.26 | -0.04 | 4.18 | 0.01  | 4.38  | -0.02 | 4.28  | -0.05 | 4.58  | 0.00  | 4.54  | 0.01  | 4.56 | 0.10  |
| H5'                           | 4.07 | 0.00  | 4.07 | 0.01  | 4.14  | -0.01 | 4.28  | 0.00  | 4.36  | 0.00  | 4.24  | -0.01 | 4.15 | 0.02  |
| H5''                          | 3.77 | 0.00  | 4.02 | -0.01 | 4.10  | -0.01 | 4.23  | 0.00  | 4.28  | -0.04 | 4.20  | -0.01 | 4.07 | 0.00  |
| CH <sub>3</sub>               | 1.60 | -0.05 | 1.51 | -0.02 | -     | -     | -     | -     | -     | -     | -     | -     | 1.84 | 0.21  |
| NH <sub>2</sub> <sup>b</sup>  | -    | -     | -    | -     | 9.73  | -0.11 | 9.05  | -0.12 | 9.05  | -0.12 | 7.47  | 0.01  | -    | -     |
| NH <sub>2</sub> <sup>nb</sup> | -    | -     | -    | -     | 6.14  | -0.16 | 6.06  | -0.14 | 7.75  | -0.07 | 6.77  | 0.01  | -    | -     |
| NH                            | -    | -     | -    | -     | 11.36 | -0.15 | 10.97 | -0.11 | 10.82 | -0.12 | 10.55 | -0.34 | -    | -     |

\* Negative sign in  $\Delta\delta$  denotes upfield shift.

**Table S1 c)**  $^1\text{H}$  Chemical shift (ppm) of daunomycin protons in free daunomycin ( $\delta_f$ ) and in daunomycin-[d-(TTGGGGT)]<sub>4</sub> complex ( $\delta_b$ ) at various D/N ratios in KBPES buffer containing 100 mM KCl (90% H<sub>2</sub>O+10% D<sub>2</sub>O) at 25 °C.  $\Delta\delta = \delta_b - \delta_f$ , nd: not determined

| Daunomycin Protons | Free Daunomycin | D/N=1.0    |                | D/N=2.0    |                | D/N=3.0    |                | D/N=4.0    |                |
|--------------------|-----------------|------------|----------------|------------|----------------|------------|----------------|------------|----------------|
|                    | $\delta_f$      | $\delta_b$ | $\Delta\delta$ | $\delta_b$ | $\Delta\delta$ | $\delta_b$ | $\Delta\delta$ | $\delta_b$ | $\Delta\delta$ |
| 2H                 | 7.71            | 7.30       | -0.41          | 7.26       | -0.45          | 7.19       | -0.52          | 7.20       | -0.51          |
| 1H                 | 7.53            | 7.21       | -0.32          | 7.18       | -0.35          | 7.09       | -0.44          | 7.03       | -0.50          |
| 3H                 | 7.43            | 7.04       | -0.39          | 7.02       | -0.41          | 6.95       | -0.48          | 6.93       | -0.50          |
| 4OCH <sub>3</sub>  | 3.94            | 3.70       | -0.24          | 3.67       | -0.27          | 3.62       | -0.32          | 3.60       | -0.34          |
| 1'H                | 5.49            | nd         | nd             | 4.92       | -0.57          | 5.06       | -0.43          | 5.11       | -0.38          |
| 7H                 | 4.82            | nd         | nd             | 4.57       | -0.25          | 4.54       | -0.28          | 4.55       | -0.27          |
| 5'H                | 4.27            | 3.81       | -0.46          | 3.91       | -0.36          | 3.98       | -0.29          | 4.05       | -0.22          |
| 4'H                | 3.83            | 3.53       | -0.3           | 3.60       | -0.23          | 3.64       | -0.19          | 3.68       | -0.15          |
| 3'H                | 3.70            | 3.33       | -0.37          | 3.42       | -0.28          | 3.48       | -0.22          | 3.53       | -0.17          |
| 5'CH <sub>3</sub>  | 1.30            | 0.74       | -0.56          | 0.90       | -0.4           | 1.02       | -0.28          | 1.05       | -0.25          |
| 9COCH <sub>3</sub> | 2.45            | 2.43       | -0.02          | 2.33       | -0.12          | 2.28       | -0.17          | 2.28       | -0.17          |
| 2'eq               | 1.99            | 1.66       | -0.33          | 1.77       | -0.22          | 1.78       | -0.21          | 1.81       | -0.18          |
| 2'ax               | 1.99            | 1.56       | -0.43          | 1.73       | -0.26          | 1.73       | -0.26          | 1.81       | -0.18          |
| 8eq                | 2.23            | 2.08       | -0.15          | 1.87       | -0.36          | 1.91       | -0.32          | 1.91       | -0.32          |
| 8ax                | 2.13            | 1.72       | -0.41          | 1.81       | -0.32          | 1.85       | -0.28          | 1.91       | -0.22          |
| 10eq               | 2.94            | 2.64       | -0.3           | 2.59       | -0.35          | 2.56       | -0.38          | 2.58       | -0.36          |
| 10ax               | 2.70            | 2.56       | -0.14          | 2.54       | -0.16          | 2.53       | -0.17          | 2.53       | -0.17          |

\* Negative sign in  $\Delta\delta$  denotes upfield shift.

**Table S2 a)** <sup>1</sup>H Chemical shift (ppm) of methyl and imino protons in free [d-(TTGGGGT)]<sub>4</sub> (δ<sub>f</sub>) and daunomycin-[d-(TTGGGGT)]<sub>4</sub> complex (δ<sub>b</sub>) at various D/N ratios in KBPES buffer containing 100 mM KCl (90% H<sub>2</sub>O + 10% D<sub>2</sub>O) at 25 °C. Δδ = δ<sub>b</sub> - δ<sub>f</sub>

| Protons                    | CH <sub>3</sub> |       |                |       |                |      | NH             |       |                |       |                |       |                |       |
|----------------------------|-----------------|-------|----------------|-------|----------------|------|----------------|-------|----------------|-------|----------------|-------|----------------|-------|
|                            | T1              |       | T2             |       | T7             |      | G3             |       | G4             |       | G5             |       | G6             |       |
| Free DNA (δ <sub>f</sub> ) | 1.65            |       | 1.53           |       | 1.63           |      | 11.51          |       | 11.08          |       | 10.94          |       | 10.89          |       |
|                            | δ <sub>b</sub>  | Δδ    | δ <sub>b</sub> | Δδ    | δ <sub>b</sub> | Δδ   | δ <sub>b</sub> | Δδ    | δ <sub>b</sub> | Δδ    | δ <sub>b</sub> | Δδ    | δ <sub>b</sub> | Δδ    |
| D/N=0.2                    | 1.65            | 0.00  | 1.53           | 0.00  | 1.66           | 0.03 | 11.50          | -0.01 | 11.07          | -0.01 | 10.93          | -0.01 | 10.86          | -0.03 |
| D/N=0.5                    | 1.65            | 0.00  | 1.53           | 0.00  | 1.72           | 0.09 | 11.47          | -0.04 | 11.06          | -0.02 | 10.90          | -0.04 | 10.80          | -0.09 |
| D/N=0.8                    | 1.65            | 0.00  | 1.53           | 0.00  | 1.78           | 0.15 | 11.48          | -0.03 | 11.05          | -0.03 | 10.88          | -0.06 | 10.70          | -0.19 |
| D/N=1.0                    | 1.64            | -0.01 | 1.53           | 0.00  | 1.80           | 0.17 | 11.47          | -0.04 | 11.04          | -0.04 | 10.87          | -0.07 | 10.67          | -0.22 |
| D/N=1.5                    | 1.63            | -0.02 | 1.52           | -0.01 | 1.83           | 0.20 | 11.45          | -0.06 | 11.02          | -0.06 | 10.85          | -0.09 | 10.62          | -0.27 |
| D/N=2.0                    | 1.62            | -0.03 | 1.52           | -0.01 | 1.84           | 0.21 | 11.42          | -0.09 | 11.01          | -0.07 | 10.84          | -0.10 | 10.59          | -0.30 |
| D/N=2.5                    | 1.61            | -0.04 | 1.52           | -0.01 | 1.84           | 0.21 | 11.39          | -0.12 | 11.00          | -0.08 | 10.83          | -0.11 | 10.58          | -0.31 |
| D/N=3.0                    | 1.61            | -0.04 | 1.52           | -0.01 | 1.84           | 0.21 | 11.37          | -0.14 | 10.98          | -0.10 | 10.82          | -0.12 | 10.55          | -0.34 |
| D/N=3.5                    | 1.60            | -0.05 | 1.52           | -0.01 | 1.84           | 0.21 | 11.35          | -0.16 | 10.97          | -0.11 | 10.82          | -0.12 | 10.55          | -0.34 |
| D/N=4.0                    | 1.60            | -0.05 | 1.52           | -0.01 | 1.84           | 0.21 | 11.36          | -0.15 | 10.97          | -0.11 | 10.82          | -0.12 | 10.55          | -0.34 |

\* Negative sign in Δδ denotes upfield shift

**Table S2 b)** <sup>1</sup>H Chemical shift (ppm) of base protons in free [d-(TTGGGGT)]<sub>4</sub> (δ<sub>f</sub>) and daunomycin-[d-(TTGGGGT)]<sub>4</sub> complex (δ<sub>b</sub>) at various D/N ratios in KBPES buffer containing 100 mM KCl (90% H<sub>2</sub>O + 10% D<sub>2</sub>O) at 25 °C. Δδ = δ<sub>b</sub> - δ<sub>f</sub>

| Protons                    | H8/H6          |       |                |       |                |       |                |       |                |       |                |       |                |      |
|----------------------------|----------------|-------|----------------|-------|----------------|-------|----------------|-------|----------------|-------|----------------|-------|----------------|------|
|                            | T1             |       | T2             |       | G3             |       | G4             |       | G5             |       | G6             |       | T7             |      |
| Free DNA (δ <sub>f</sub> ) | 7.59           |       | 7.54           |       | 8.14           |       | 7.80           |       | 7.84           |       | 7.71           |       | 7.34           |      |
|                            | δ <sub>b</sub> | Δδ    | δ <sub>b</sub> | Δδ    | δ <sub>b</sub> | Δδ    | δ <sub>b</sub> | Δδ    | δ <sub>b</sub> | Δδ    | δ <sub>b</sub> | Δδ    | δ <sub>b</sub> | Δδ   |
| D/N=0.2                    | 7.57           | -0.02 | 7.54           | 0.00  | 8.13           | -0.01 | 7.80           | 0.00  | 7.83           | -0.01 | 7.71           | 0.00  | 7.35           | 0.01 |
| D/N=0.5                    | 7.57           | -0.02 | 7.54           | 0.00  | 8.13           | -0.01 | 7.79           | -0.01 | 7.82           | -0.02 | 7.71           | 0.00  | 7.44           | 0.10 |
| D/N=0.8                    | 7.57           | -0.02 | 7.54           | 0.00  | 8.12           | -0.02 | 7.78           | -0.02 | 7.8            | -0.04 | 7.72           | 0.01  | 7.55           | 0.21 |
| D/N=1.0                    | 7.57           | -0.02 | 7.53           | -0.01 | 8.12           | -0.02 | 7.78           | -0.02 | 7.79           | -0.05 | 7.72           | 0.01  | 7.59           | 0.25 |
| D/N=1.5                    | 7.57           | -0.02 | 7.54           | 0.00  | 8.11           | -0.03 | 7.78           | -0.02 | 7.79           | -0.05 | 7.72           | 0.01  | 7.63           | 0.29 |
| D/N=2.0                    | 7.57           | -0.02 | 7.54           | 0.00  | 8.11           | -0.03 | 7.77           | -0.03 | 7.77           | -0.07 | 7.72           | 0.01  | 7.64           | 0.30 |
| D/N=2.5                    | 7.57           | -0.02 | 7.54           | 0.00  | 8.10           | -0.04 | 7.76           | -0.04 | 7.76           | -0.08 | 7.71           | 0.00  | 7.65           | 0.31 |
| D/N=3.0                    | 7.57           | -0.02 | 7.54           | 0.00  | 8.09           | -0.05 | 7.75           | -0.05 | 7.75           | -0.09 | 7.70           | -0.01 | 7.64           | 0.30 |
| D/N=3.5                    | 7.56           | -0.03 | 7.54           | 0.00  | 8.07           | -0.07 | 7.74           | -0.06 | 7.74           | -0.10 | 7.70           | -0.01 | 7.64           | 0.30 |
| D/N=4.0                    | 7.57           | -0.02 | 7.54           | 0.00  | 8.08           | -0.06 | 7.74           | -0.06 | 7.74           | -0.10 | 7.69           | -0.02 | 7.64           | 0.30 |

\* Negative sign in Δδ denotes upfield shift.

**Table S2 (c)**  $^1\text{H}$  Chemical shift (ppm) of H1' sugar protons in free [d-(TTGGGGT)]<sub>4</sub> ( $\delta_f$ ) and daunomycin-[d-(TTGGGGT)]<sub>4</sub> complex ( $\delta_b$ ) at various D/N ratios in KBPES buffer containing 100 mM KCl (90% H<sub>2</sub>O + 10% D<sub>2</sub>O) at 25 °C.  $\Delta\delta = \delta_b - \delta_f$

| Protons                 | H1'        |                |            |                |            |                |
|-------------------------|------------|----------------|------------|----------------|------------|----------------|
|                         | T1         |                | G6         |                | T7         |                |
| Free DNA ( $\delta_f$ ) | 6.14       |                | 6.24       |                | 6.05       |                |
|                         | $\delta_b$ | $\Delta\delta$ | $\delta_b$ | $\Delta\delta$ | $\delta_b$ | $\Delta\delta$ |
| D/N=0.2                 | 6.14       | 0.00           | 6.25       | 0.01           | 6.06       | 0.01           |
| D/N=0.5                 | 6.13       | -0.01          | 6.28       | 0.04           | 6.10       | 0.05           |
| D/N=0.8                 | 6.13       | -0.01          | 6.29       | 0.05           | 6.17       | 0.12           |
| D/N=1.0                 | 6.14       | 0.00           | 6.30       | 0.06           | 6.18       | 0.13           |
| D/N=1.5                 | 6.15       | 0.01           | 6.30       | 0.06           | 6.21       | 0.16           |
| D/N=2.0                 | 6.15       | 0.01           | 6.31       | 0.07           | 6.21       | 0.16           |
| D/N=2.5                 | 6.16       | 0.02           | 6.30       | 0.06           | 6.21       | 0.16           |
| D/N=3.0                 | 6.17       | 0.03           | 6.29       | 0.05           | 6.21       | 0.16           |
| D/N=3.5                 | 6.16       | 0.02           | 6.28       | 0.04           | 6.20       | 0.15           |
| D/N=4.0                 | 6.15       | 0.01           | 6.27       | 0.03           | 6.20       | 0.15           |

\* Negative sign in  $\Delta\delta$  denotes upfield shift.

**Table S2 d)**  $^1\text{H}$  Chemical shift (ppm) of daunomycin protons in free state ( $\delta_f$ ) and in daunomycin-[d-(TTGGGGT)]<sub>4</sub> complex ( $\delta_b$ ) at various D/N ratios in KBPES buffer containing 100 mM KCl (90% H<sub>2</sub>O + 10% D<sub>2</sub>O) at 25 °C.  $\Delta\delta = \delta_b - \delta_f$

| Protons                        | Daunomycin |                |            |                |            |                |                   |                |
|--------------------------------|------------|----------------|------------|----------------|------------|----------------|-------------------|----------------|
|                                | 1H         |                | 2H         |                | 3H         |                | 5'CH <sub>3</sub> |                |
| Free Daunomycin ( $\delta_f$ ) | 7.53       |                | 7.71       |                | 7.43       |                | 1.30              |                |
|                                | $\delta_b$ | $\Delta\delta$ | $\delta_b$ | $\Delta\delta$ | $\delta_b$ | $\Delta\delta$ | $\delta_b$        | $\Delta\delta$ |
| D/N=0.2                        | 7.11       | -0.42          | 7.20       | -0.51          | 7.03       | -0.40          | 0.69              | -0.61          |
| D/N=0.5                        | 7.21       | -0.32          | 7.30       | -0.41          | 7.04       | -0.39          | 0.70              | -0.60          |
| D/N=0.8                        | 7.21       | -0.32          | 7.30       | -0.41          | 7.04       | -0.39          | 0.72              | -0.58          |
| D/N=1.0                        | 7.21       | -0.32          | 7.30       | -0.41          | 7.04       | -0.39          | 0.74              | -0.56          |
| D/N=1.5                        | 7.20       | -0.33          | 7.29       | -0.42          | 7.04       | -0.39          | 0.81              | -0.49          |
| D/N=2.0                        | 7.18       | -0.35          | 7.26       | -0.45          | 7.02       | -0.41          | 0.90              | -0.40          |
| D/N=2.5                        | 7.14       | -0.39          | 7.22       | -0.49          | 7.00       | -0.43          | 0.97              | -0.33          |
| D/N=3.0                        | 7.09       | -0.44          | 7.19       | -0.52          | 6.95       | -0.48          | 1.00              | -0.30          |
| D/N=3.5                        | 7.07       | -0.46          | 7.17       | -0.54          | 6.95       | -0.48          | 1.05              | -0.25          |
| D/N=4.0                        | 7.03       | -0.50          | 7.16       | -0.51          | 6.93       | -0.50          | 1.05              | -0.25          |

\*Negative sign in  $\Delta\delta$  denotes upfield shift.

**Table S3** Intra molecular distances (Å) and relative intensities of intra molecular NOE cross peaks of daunomycin protons in daunomycin-[d-(TTGGGGT)]<sub>4</sub> complex at D/N = 1.0, 2.0, 3.0 and 4.0 at  $\tau_m = 250$  ms at 25 °C. nd: not determined

| S.No | Label | Intra molecular NOE correlations | Inter proton distance at D/N=2.0 | Intensity of NOE cross peak at D/N=1.0 | Intensity of NOE cross peak at D/N=2.0 | Intensity of NOE cross peak at D/N=3.0 | Intensity of NOE cross peak at D/N=4.0 |
|------|-------|----------------------------------|----------------------------------|----------------------------------------|----------------------------------------|----------------------------------------|----------------------------------------|
| 1    | D1    | 5'CH <sub>3</sub> -5'H           | 2.70                             | s                                      | s                                      | s                                      | s                                      |
| 2    | D2    | 5'CH <sub>3</sub> -4'H           | 2.74                             | s                                      | s                                      | s                                      | s                                      |
| 3    | D3    | 5'CH <sub>3</sub> -3'H           | 3.58                             | w                                      | m                                      | w                                      | nd                                     |
| 4    | D4    | 2' <sub>eq</sub> -4'H            | 2.95                             | m                                      | m                                      | m                                      | nd                                     |
| 5    | D5    | 2' <sub>eq</sub> -3'H            | 2.66                             | s                                      | s                                      | s                                      | nd                                     |
| 6    | D6    | 4OCH <sub>3</sub> -2H            | 2.90                             | s                                      | s                                      | s                                      | s                                      |
| 7    | D7    | 4OCH <sub>3</sub> -1H            | 3-4                              | m                                      | m/broad                                | m/broad                                | m/broad                                |
| 8    | D8    | 4OCH <sub>3</sub> -3H            | 2.20                             | s                                      | s                                      | s                                      | s                                      |
| 9    | D9    | 5'H-4'H                          | 2.70                             | nd                                     | s                                      | nd                                     | nd                                     |
| 10   | D10   | 5'H-3'H                          | 3.01                             | nd                                     | m                                      | m                                      | nd                                     |
| 11   | D11   | 8 <sub>ax</sub> -5'H             | 2.72                             | s                                      | s                                      | s                                      | nd                                     |

s - strong, m - medium, w – weak intensity; o- overlap



**Table S4:** Chemical shift (ppm) of phosphorus ( $^{31}\text{P}$ ) resonances in free [d-(TTGGGGT)]<sub>4</sub> ( $\delta_f$ ) and daunomycin-[d-(TTGGGGT)]<sub>4</sub> complex ( $\delta_b$ ) at various D/N ratios in KBPES buffer containing 100 mM KCl (90% H<sub>2</sub>O + 10% D<sub>2</sub>O) at 25 °C.  $\Delta\delta = \delta_b - \delta_f$

|                         | T1pT2      |                | T2pG3      |                | G3pG4      |                | G4pG5      |                | G5pG6      |                | G6pT7      |                |
|-------------------------|------------|----------------|------------|----------------|------------|----------------|------------|----------------|------------|----------------|------------|----------------|
| Free DNA ( $\delta_f$ ) | -0.44      |                | -0.69      |                | -0.78      |                | -0.90      |                | -0.87      |                | -0.77      |                |
|                         | $\delta_b$ | $\Delta\delta$ | $\delta_b$ | $\Delta\delta$ | $\delta_b$ | $\Delta\delta$ | $\delta_b$ | $\Delta\delta$ | $\delta_b$ | $\Delta\delta$ | $\delta_b$ | $\Delta\delta$ |
| D/N=0.2                 | -0.47      | -0.03          | -0.71      | -0.02          | -0.79      | -0.01          | -0.93      | -0.03          | -0.90      | -0.03          | -0.77      | 0.00           |
| D/N=0.5                 | -0.50      | -0.06          | -0.74      | -0.05          | -0.81      | -0.03          | -0.97      | -0.07          | -0.94      | -0.07          | -0.75      | 0.02           |
| D/N=0.8                 | -0.53      | -0.09          | -0.77      | -0.08          | -0.84      | -0.06          | -1.01      | -0.11          | -0.98      | -0.11          | -0.73      | 0.04           |
| D/N=1.0                 | -0.55      | -0.11          | -0.79      | -0.10          | -0.86      | -0.08          | -1.03      | -0.13          | -1.01      | -0.14          | -0.72      | 0.05           |
| D/N=1.5                 | -0.58      | -0.14          | -0.82      | -0.13          | -0.89      | -0.11          | -1.08      | -0.18          | -1.07      | -0.20          | -0.74      | 0.03           |
| D/N=2.0                 | -0.60      | -0.16          | -0.84      | -0.15          | -0.93      | -0.15          | -1.13      | -0.23          | -1.11      | -0.24          | -0.77      | 0.00           |
| D/N=2.5                 | -0.63      | -0.19          | -0.86      | -0.17          | -0.95      | -0.17          | -1.17      | -0.27          | -1.15      | -0.28          | -0.80      | -0.03          |
| D/N=3.0                 | -0.63      | -0.19          | -0.84      | -0.15          | -0.95      | -0.17          | -1.18      | -0.28          | -1.16      | -0.29          | -0.80      | -0.03          |
| D/N=3.5                 | -0.68      | -0.24          | -0.89      | -0.20          | -1.01      | -0.23          | -1.25      | -0.35          | -1.23      | -0.36          | -0.87      | -0.10          |
| D/N=4.0                 | -0.71      | -0.27          | -0.92      | -0.23          | -1.03      | -0.25          | -1.28      | -0.38          | -1.26      | -0.39          | -0.90      | -0.13          |

\*Negative sign in  $\Delta\delta$  denotes upfield shift.

**Table S5** Melting temperature ( $T_m$ ) of [d-(TTGGGGT)]<sub>4</sub> in free state and in daunomycin-[d-(TTGGGGT)]<sub>4</sub> complex at different D/N ratios obtained from Differential Scanning Calorimetry experiments. Change in melting temperature ( $\Delta T_m$ ) due to binding is also shown. nd: not determined

|          | $T_{m1}$ (°C) |                 | $T_{m2}$ (°C) |                 | $T_{m3}$ (°C) |                 | $T_{m4}$ (°C)   |
|----------|---------------|-----------------|---------------|-----------------|---------------|-----------------|-----------------|
| Free DNA | 46.2±0.4      |                 | 54.9±0.7      |                 | 72.9±0.6      |                 | 110.5±0.1       |
| Complex  |               | $\Delta T_{m1}$ |               | $\Delta T_{m2}$ |               | $\Delta T_{m3}$ | $\Delta T_{m4}$ |
| D/N=0.5  | 51.0±0.4      | 4.8             | 66.7±0.3      | 11.8            | 81.5±0.7      | 8.6             | nd              |
| D/N=1.0  | 52.4±4.8      | 6.2             | 65.1±3.3      | 10.2            | 82.0±2.9      | 9.1             | nd              |
| D/N=2.0  | 55.7±3.3      | 9.5             | 67.1±2.3      | 12.2            | 84.0±1.3      | 11.1            | nd              |
| D/N=3.0  | 55.1±1.3      | 8.9             | 69.0±1.1      | 14.1            | 85.2±0.8      | 12.3            | nd              |
| D/N=3.5  | 62.6±1.4      | 16.4            | 73.0±0.7      | 18.1            | 86.7±0.5      | 13.8            | nd              |
| D/N=4.0  | 60.8±1.6      | 14.6            | 72.6±0.4      | 17.7            | 87.3±0.5      | 14.4            | nd              |

a

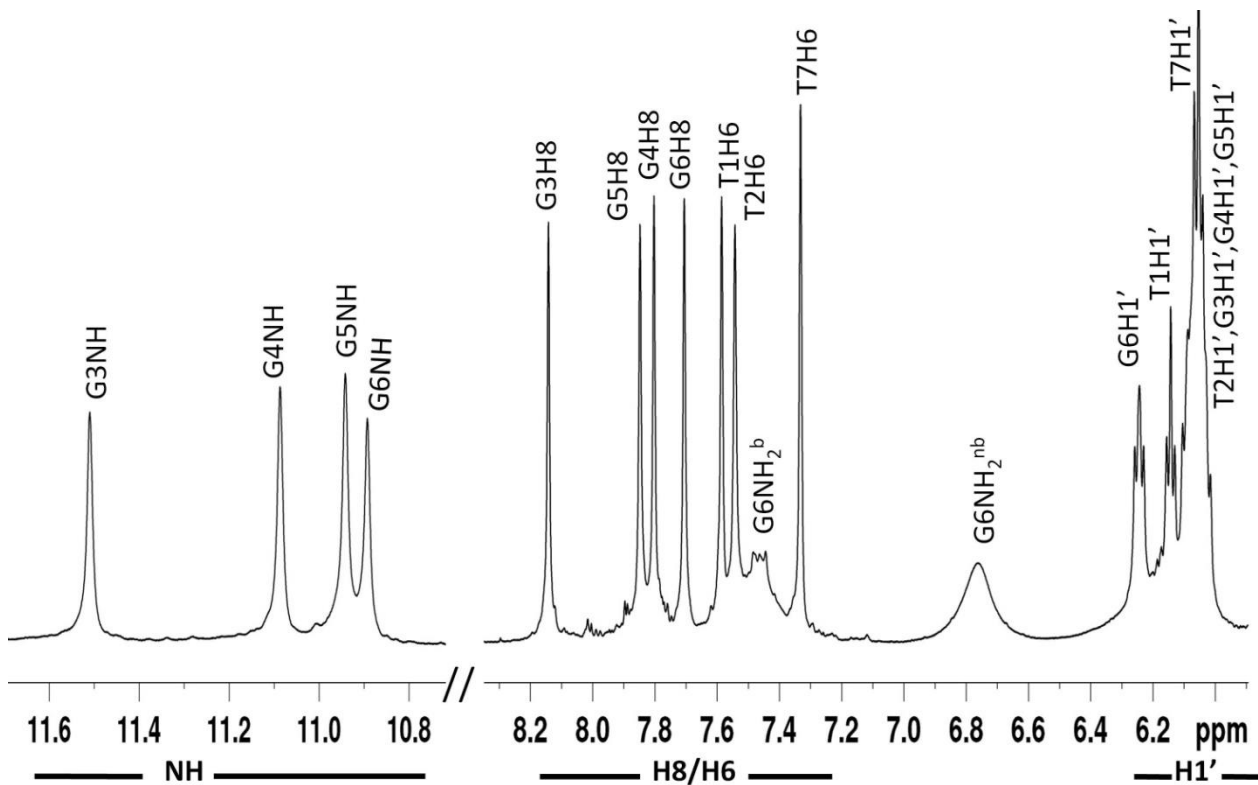

b

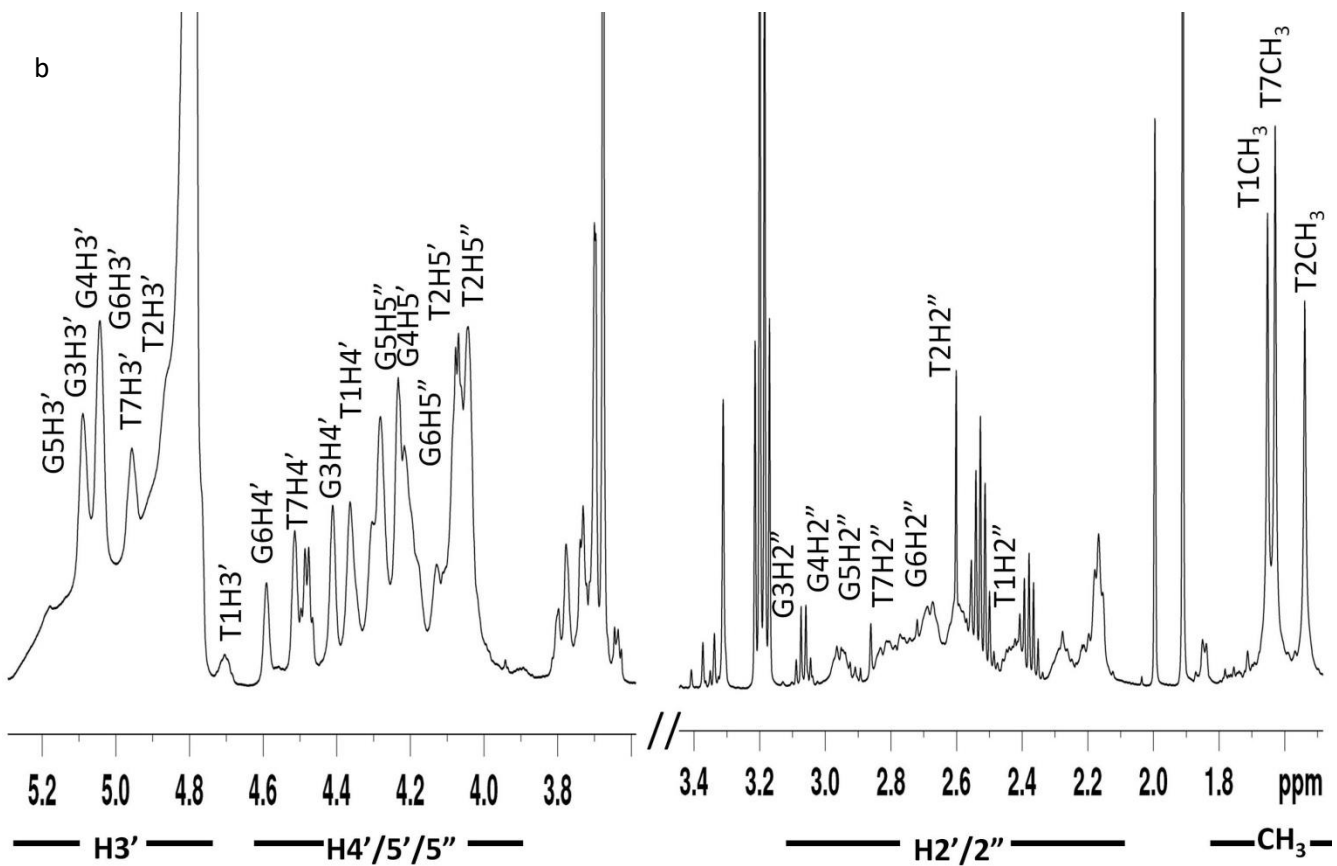

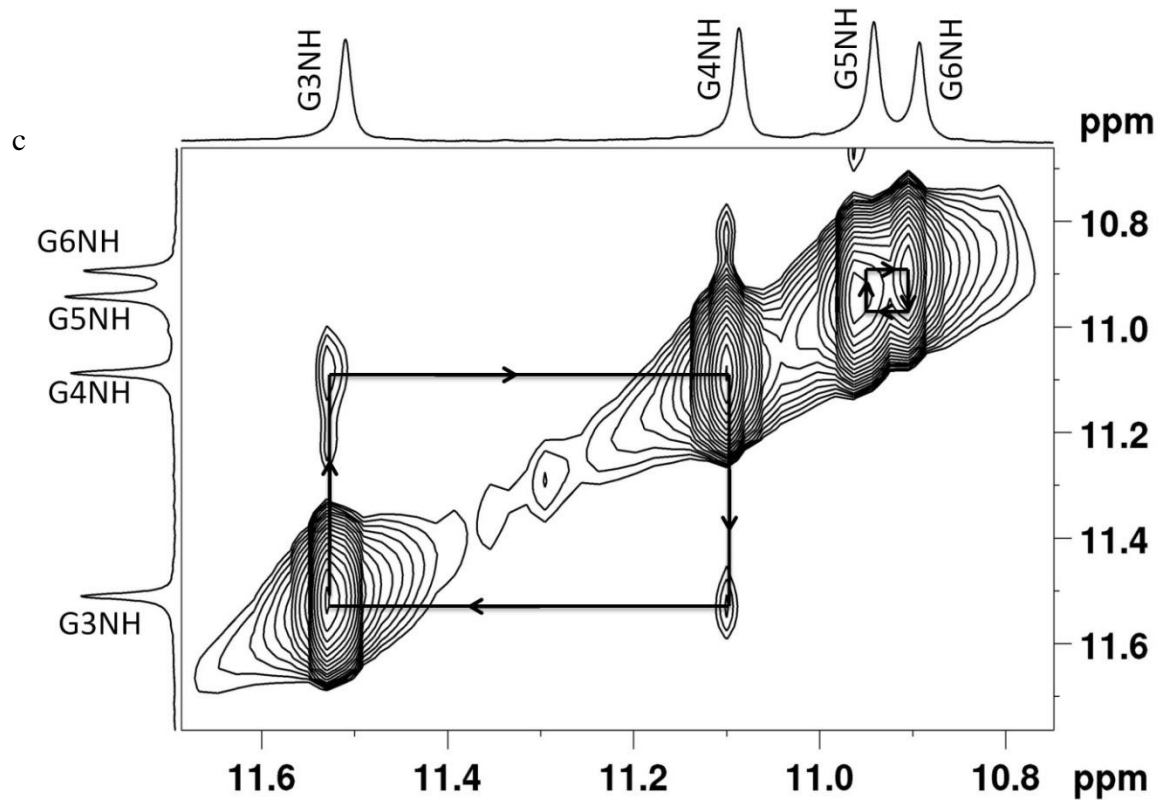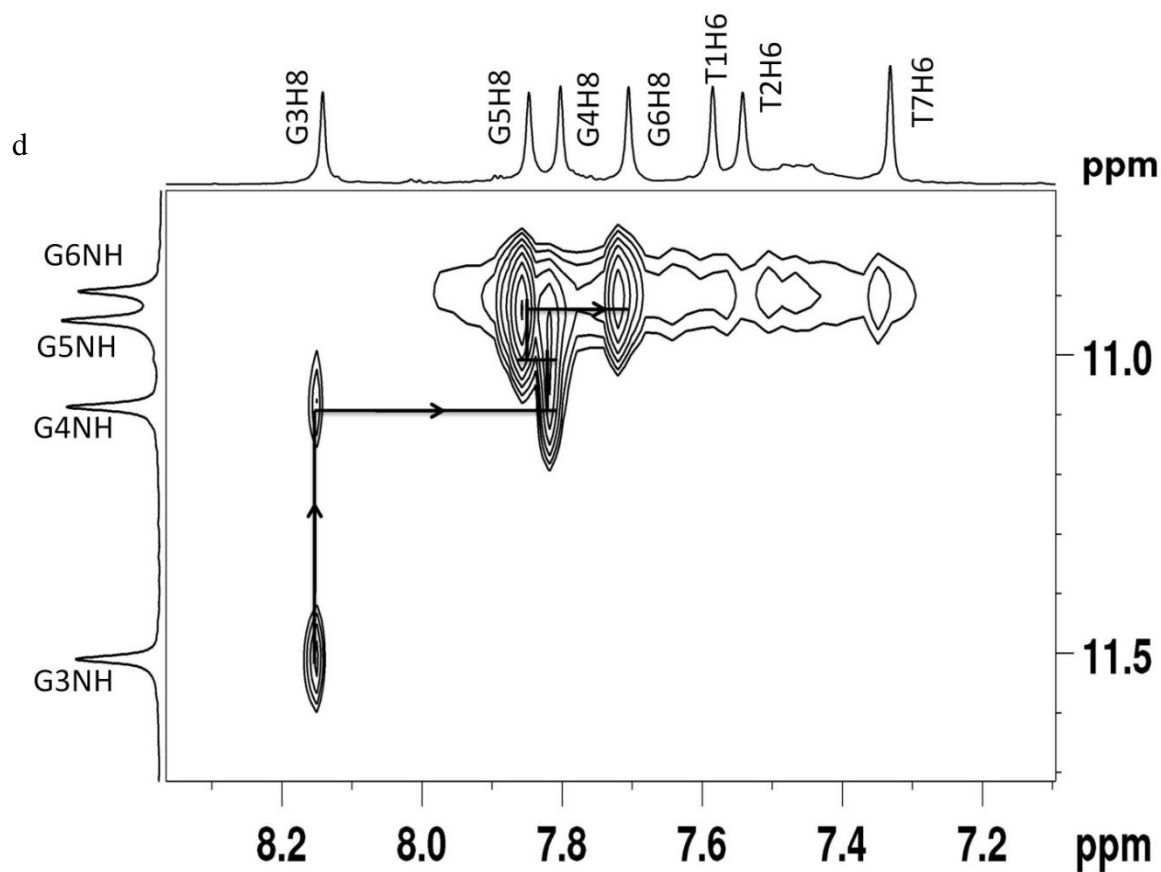

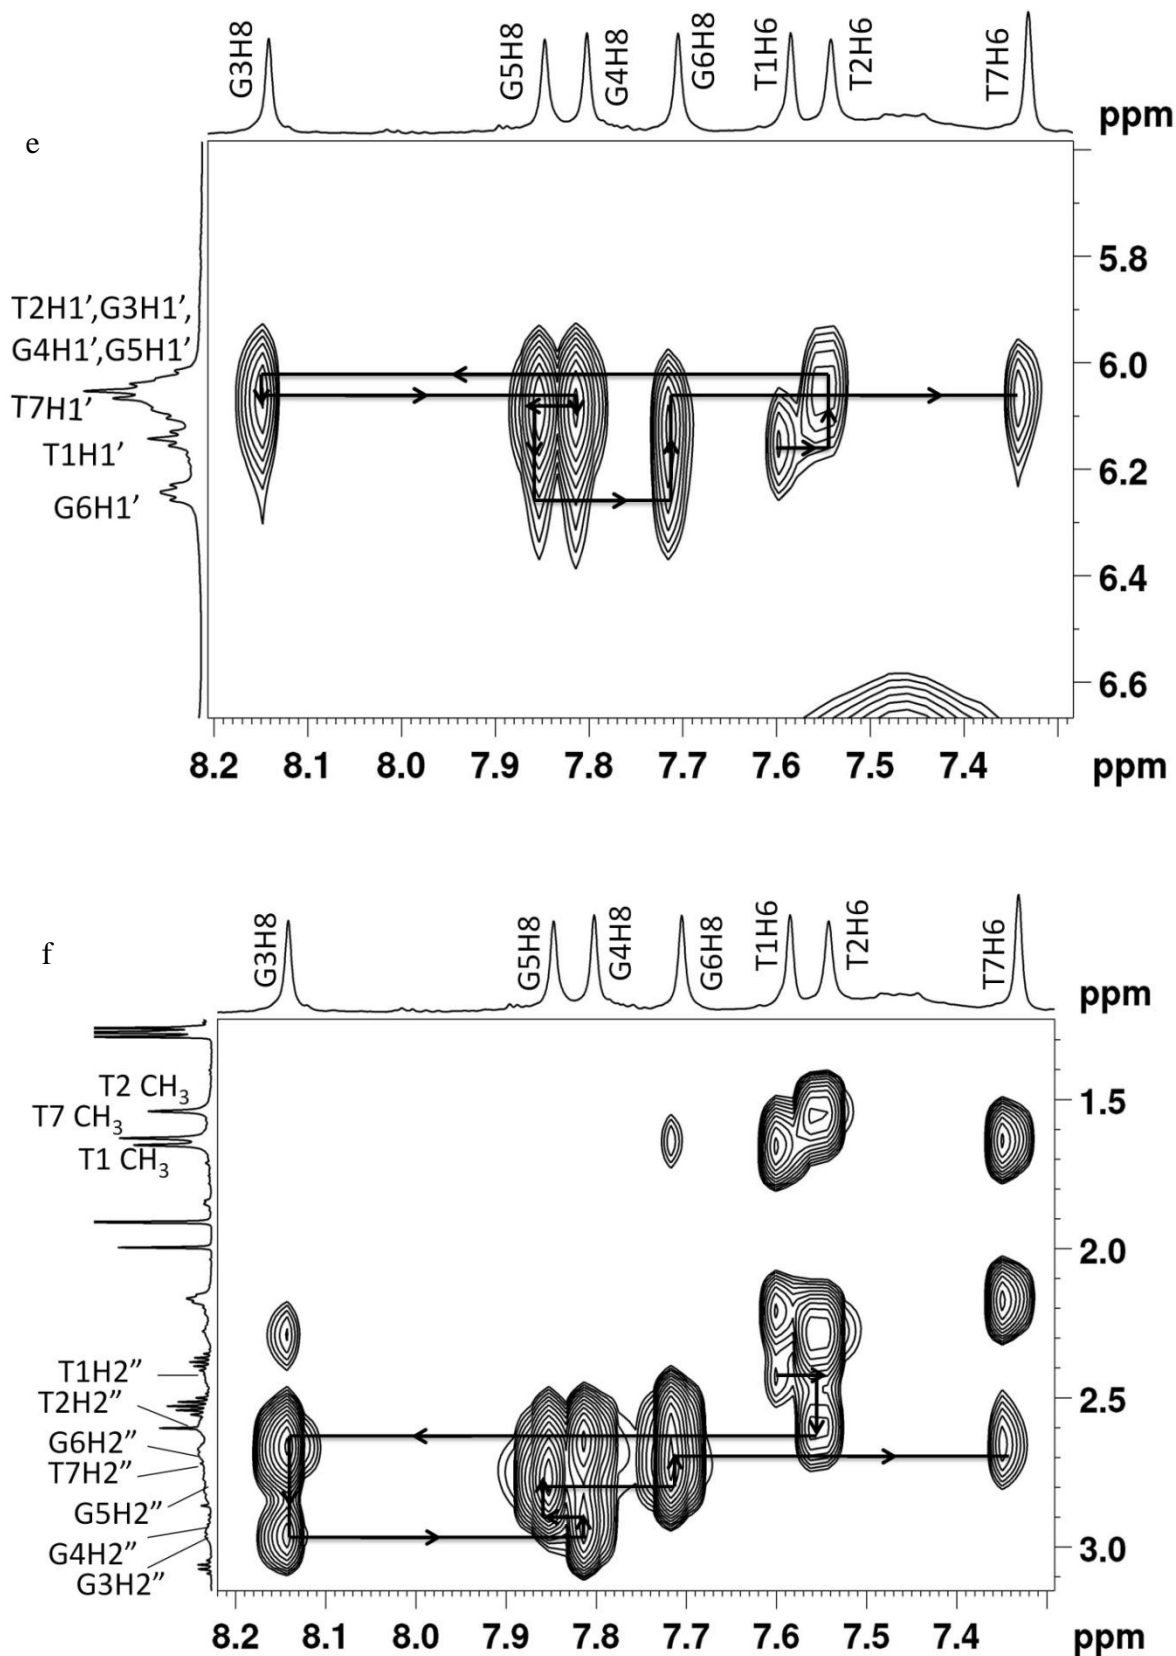

Figure S1 **a,b**) 1D <sup>1</sup>H NMR spectra of free [d-(TTGGGGT)]<sub>4</sub> in KBPES buffer containing 100 mM KCl (90% H<sub>2</sub>O + 10% D<sub>2</sub>O) at 25 °C. Expansion of <sup>1</sup>H-<sup>1</sup>H 2D NOESY spectra of free [d-(TTGGGGT)]<sub>4</sub> showing sequential connectivity (black arrows) between c) imino protons d) adjacent imino and base protons e) base-sugar (H1') protons f) base-sugar (H2'/2'') protons at  $\tau_m = 250$  ms in KBPES buffer (90% H<sub>2</sub>O + 10% D<sub>2</sub>O) at 25 °C.

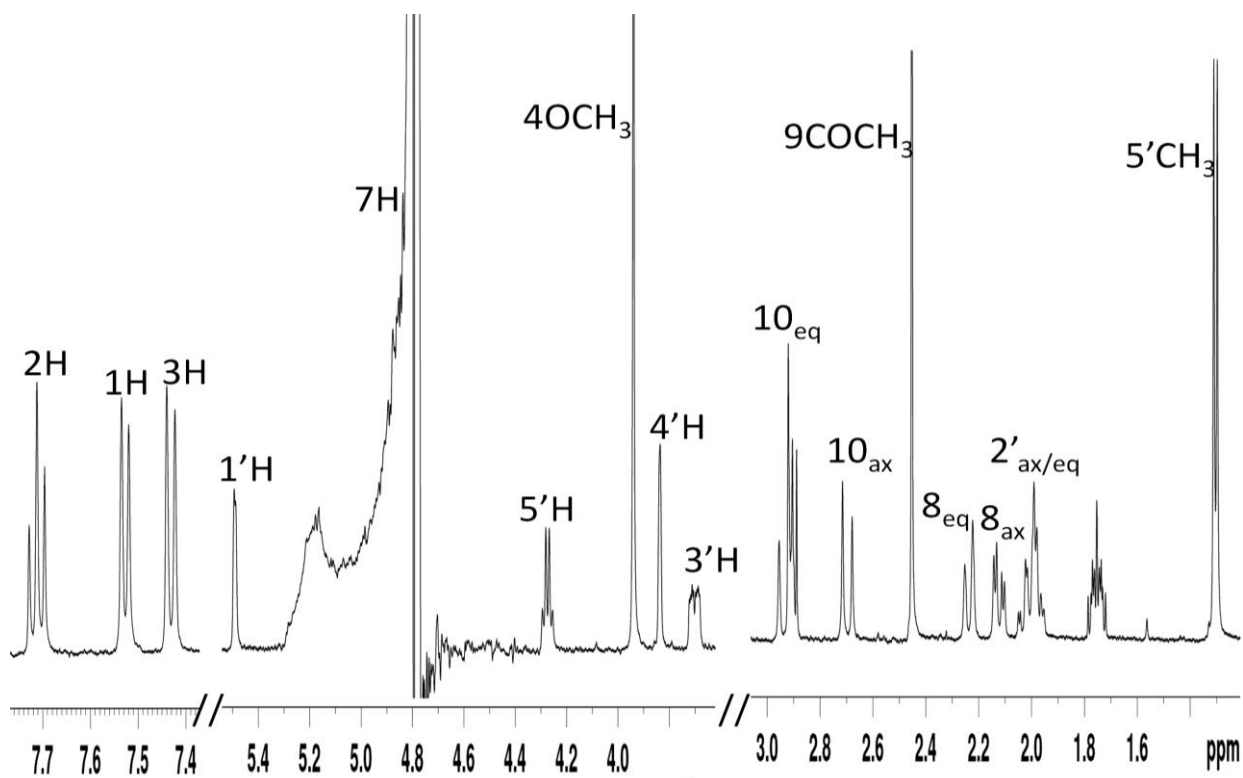

Figure S2: 1D  $^1\text{H}$  NMR spectrum of free daunomycin in water (90%  $\text{H}_2\text{O}$  + 10%  $\text{D}_2\text{O}$ ) at 25 °C.

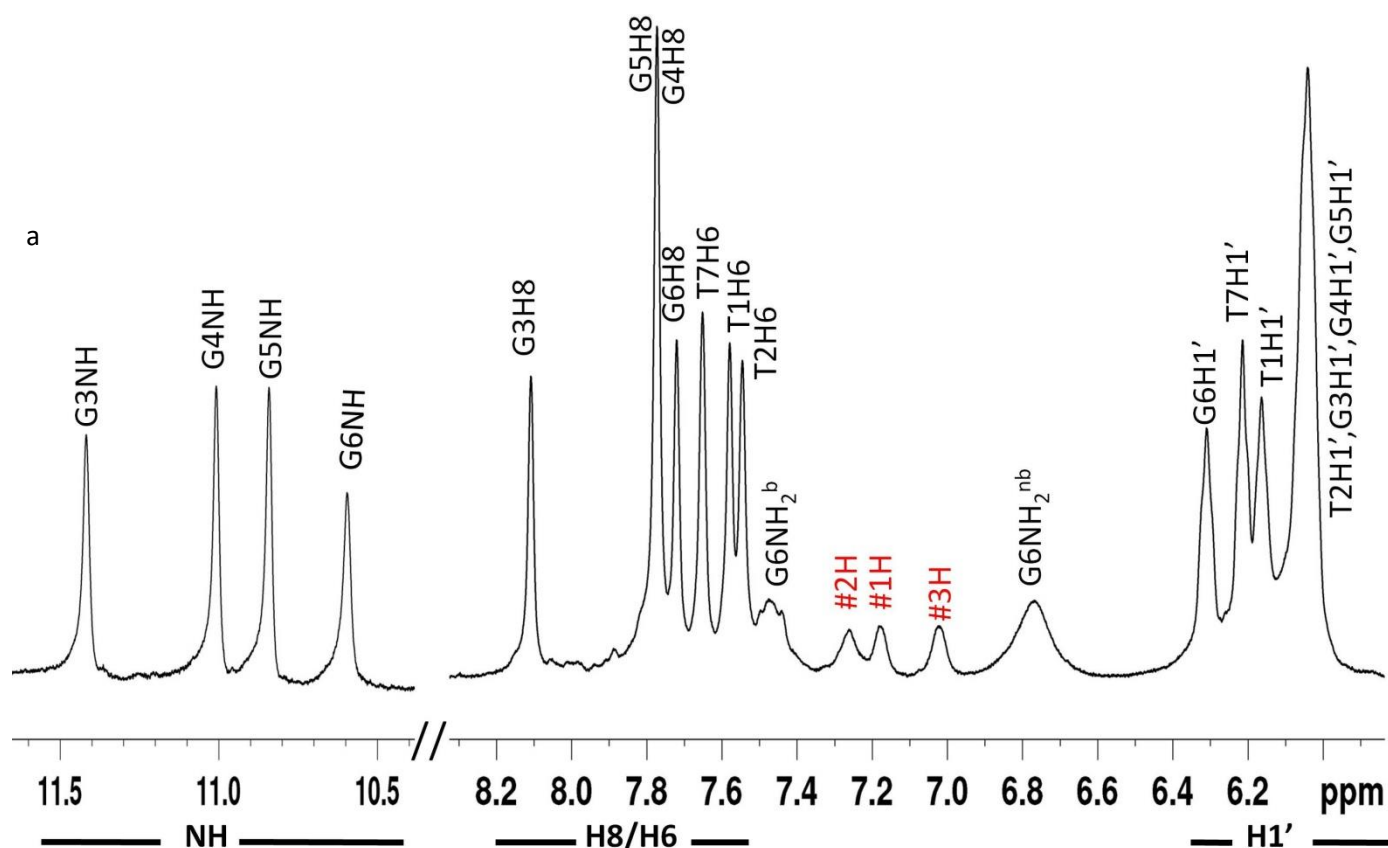

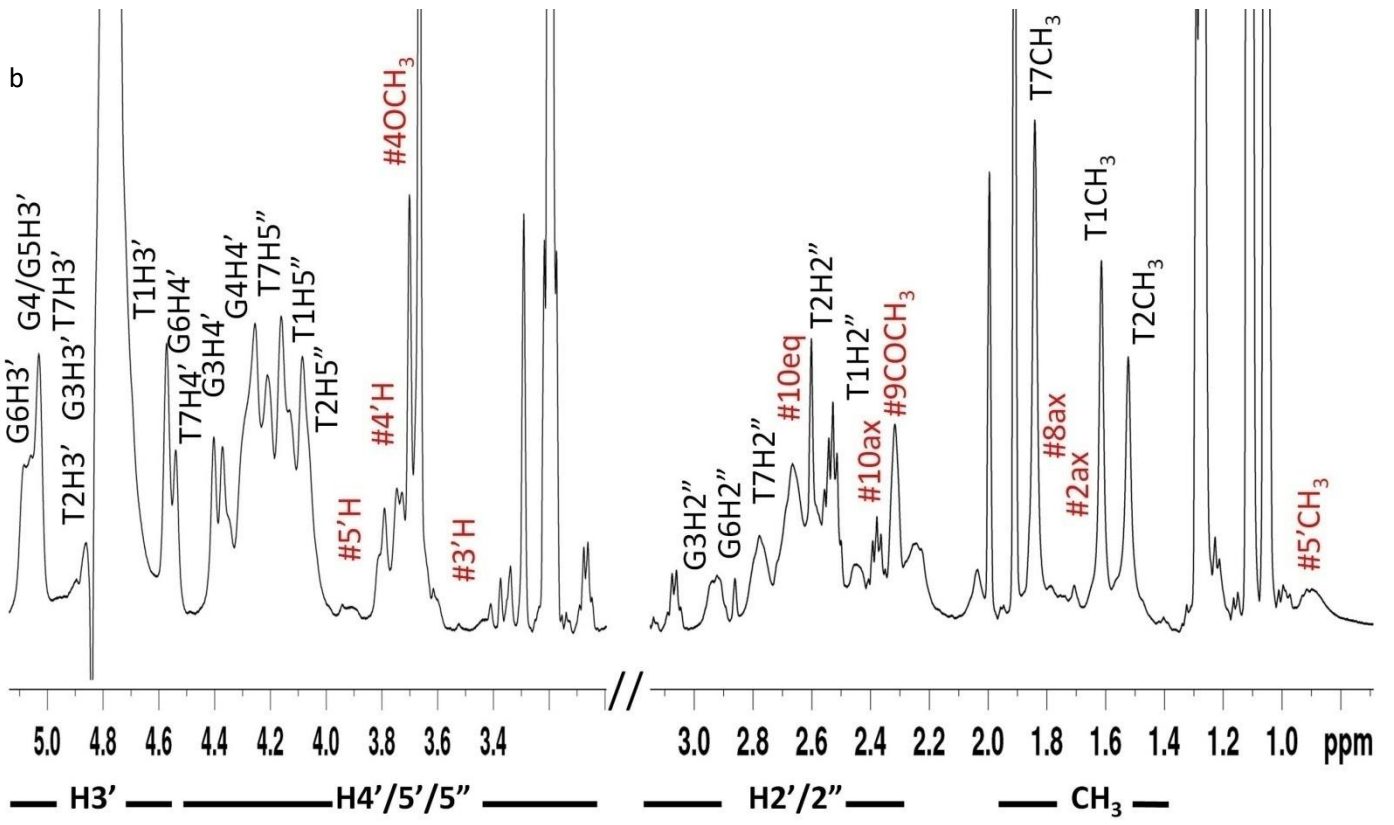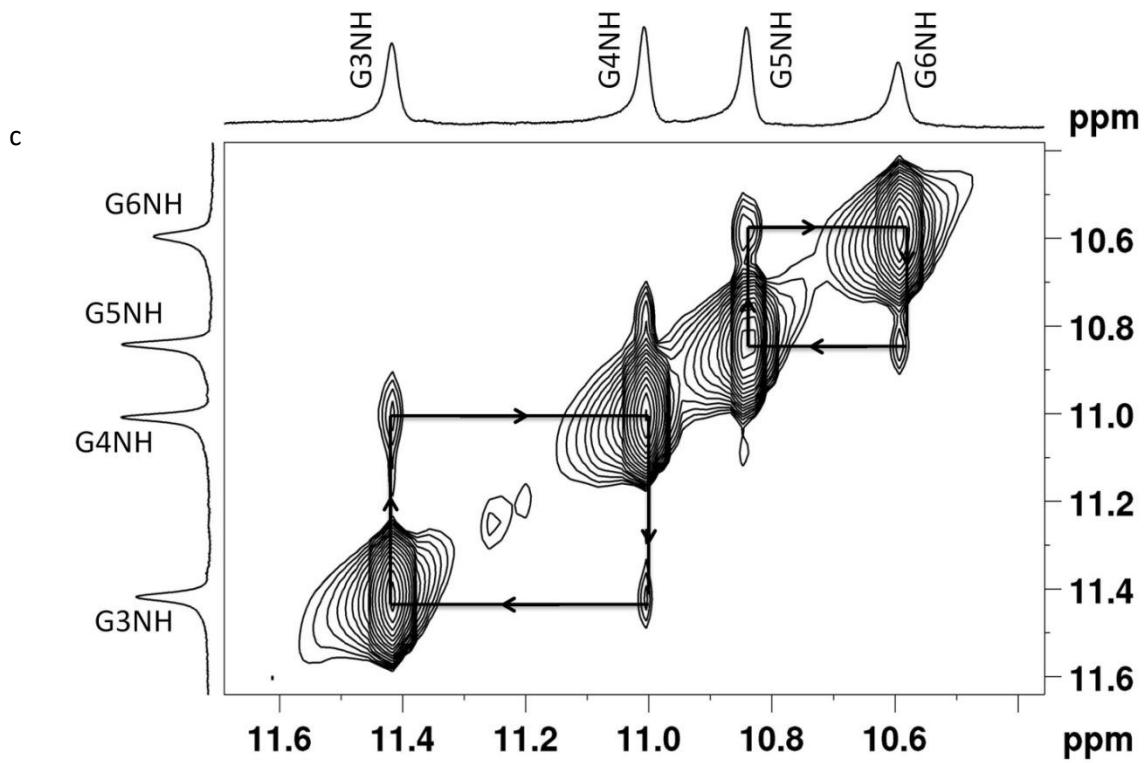

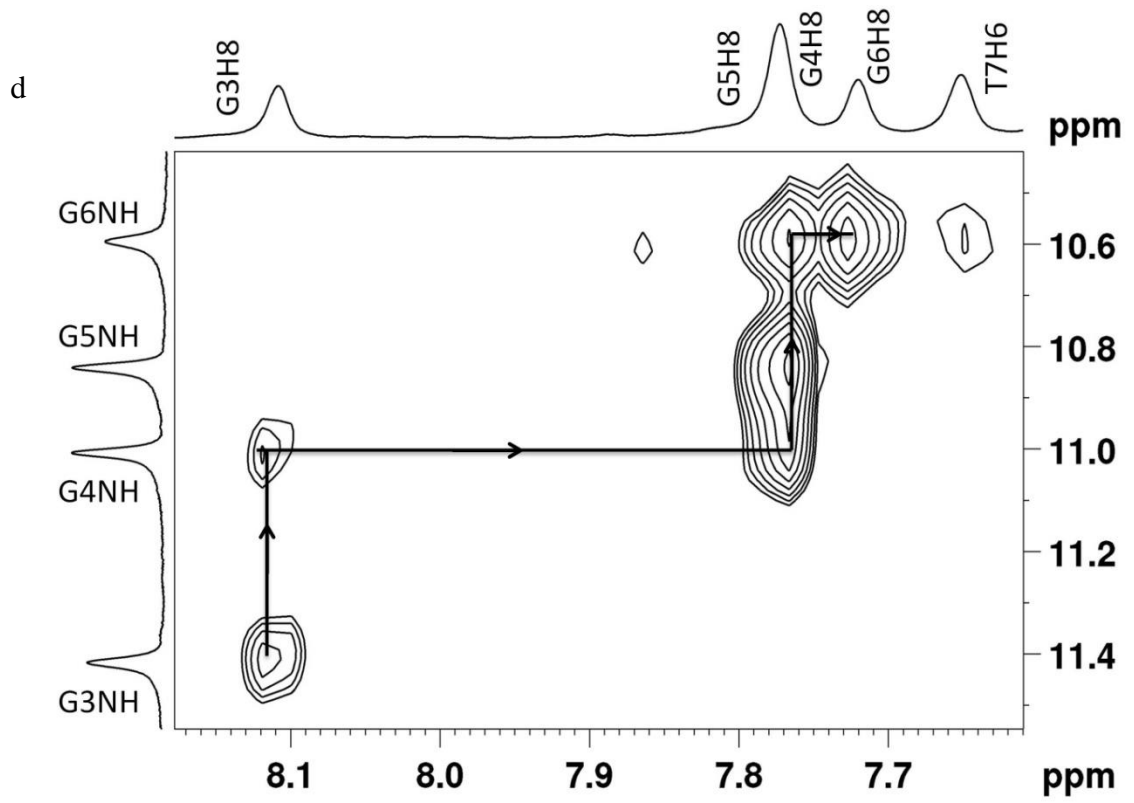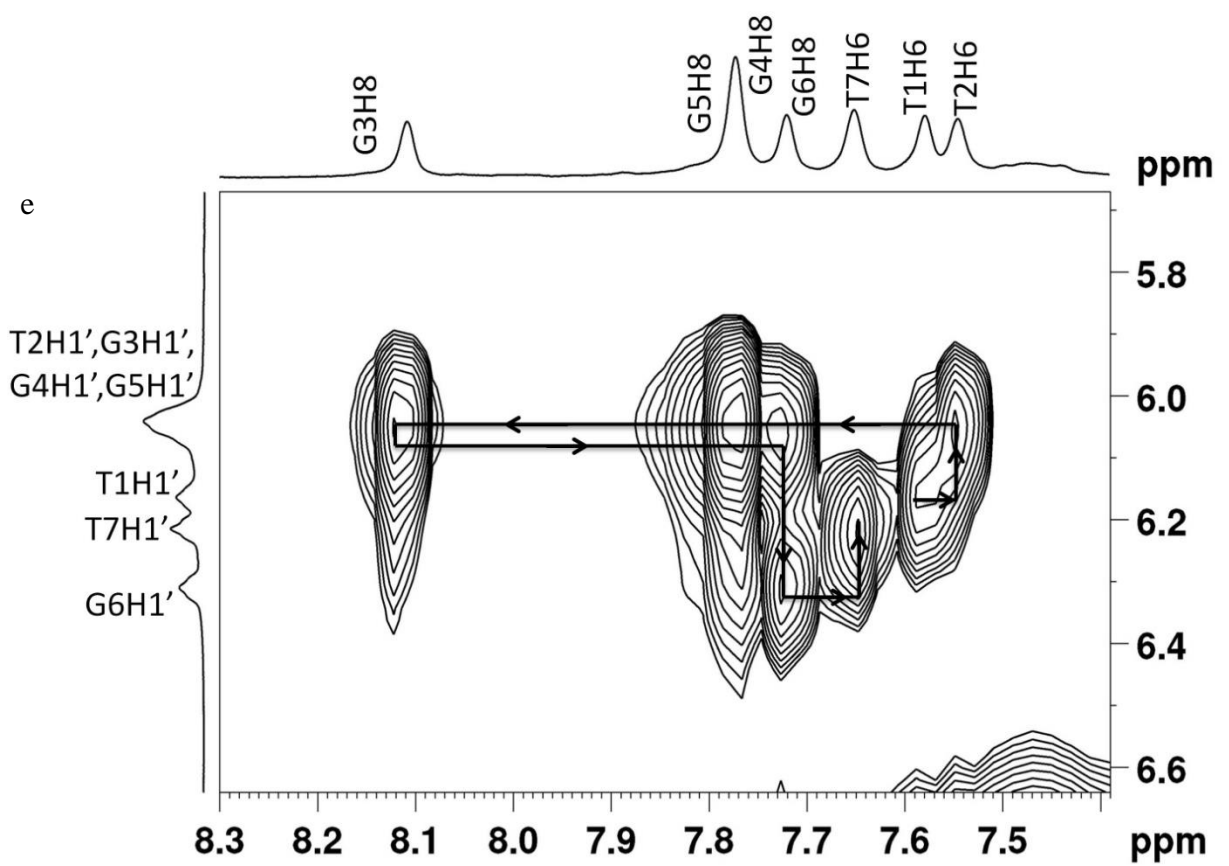



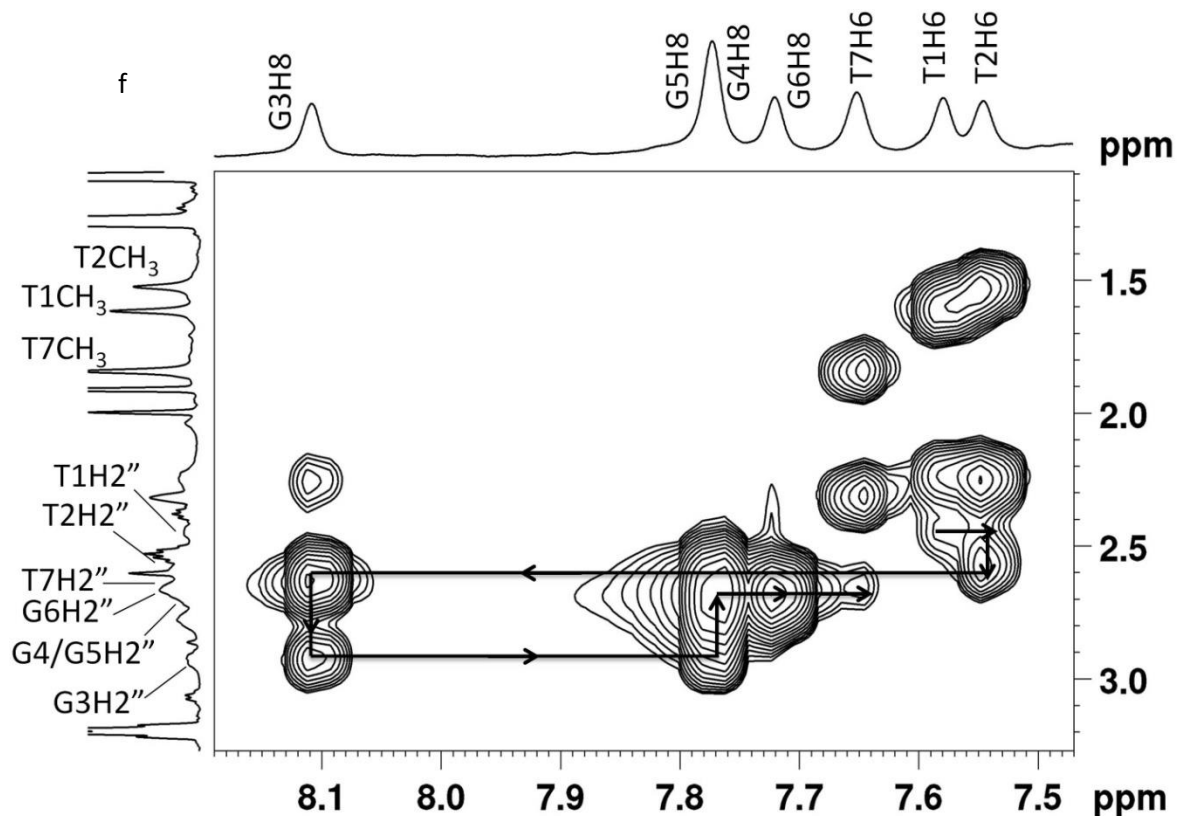

Figure S3 (a,b) 1D  $^1\text{H}$  NMR spectrum of daunomycin-DNA [d-(TTGGGGT)]<sub>4</sub> complex at D/N = 2.0 in KBPES buffer containing 100 mM KCl (90% H<sub>2</sub>O + 10% D<sub>2</sub>O) at 25 °C. Daunomycin protons are represented by (#). Expansion of  $^1\text{H}$ - $^1\text{H}$  2D NOESY spectra of daunomycin-DNA [d-(TTGGGGT)]<sub>4</sub> complex at D/N = 2.0 showing sequential connectivity (black arrows) between c) imino protons d) adjacent imino and base protons e) base-sugar (H1') protons f) base-sugar (H2'/2'') protons at  $\tau_m = 250$  ms in KBPES buffer (90% H<sub>2</sub>O+10% D<sub>2</sub>O) at 25 °C.

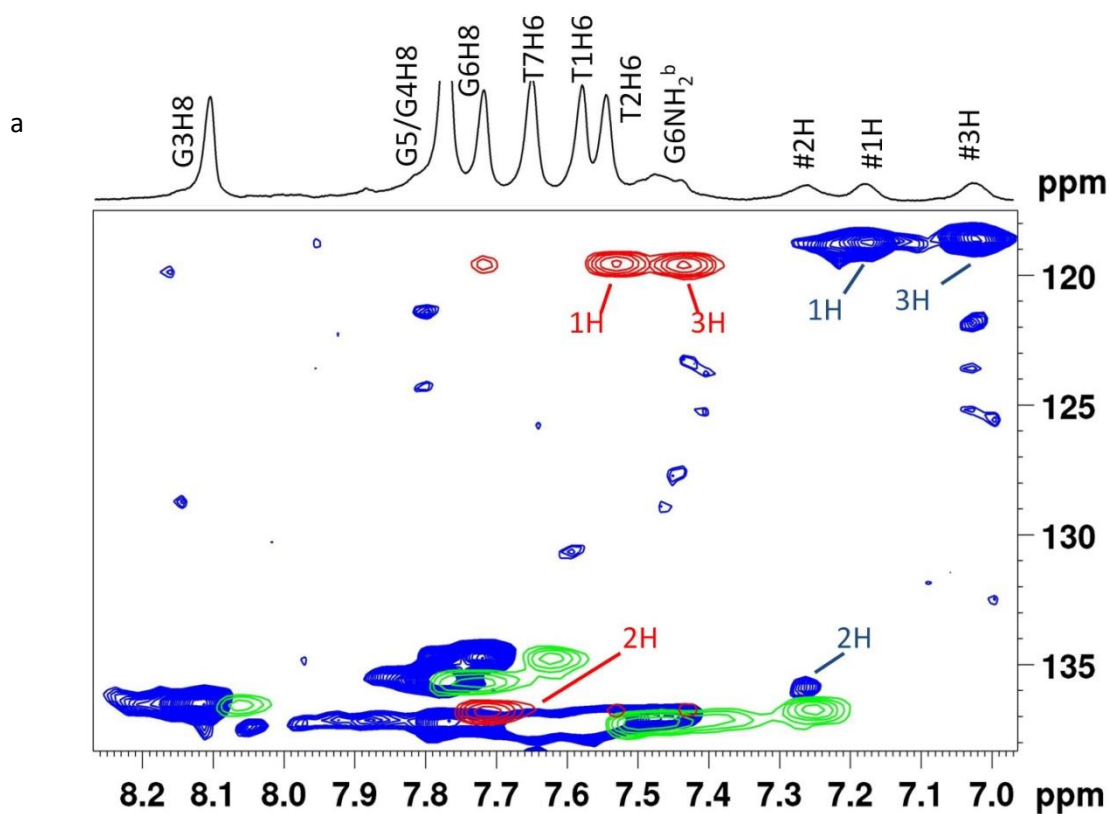

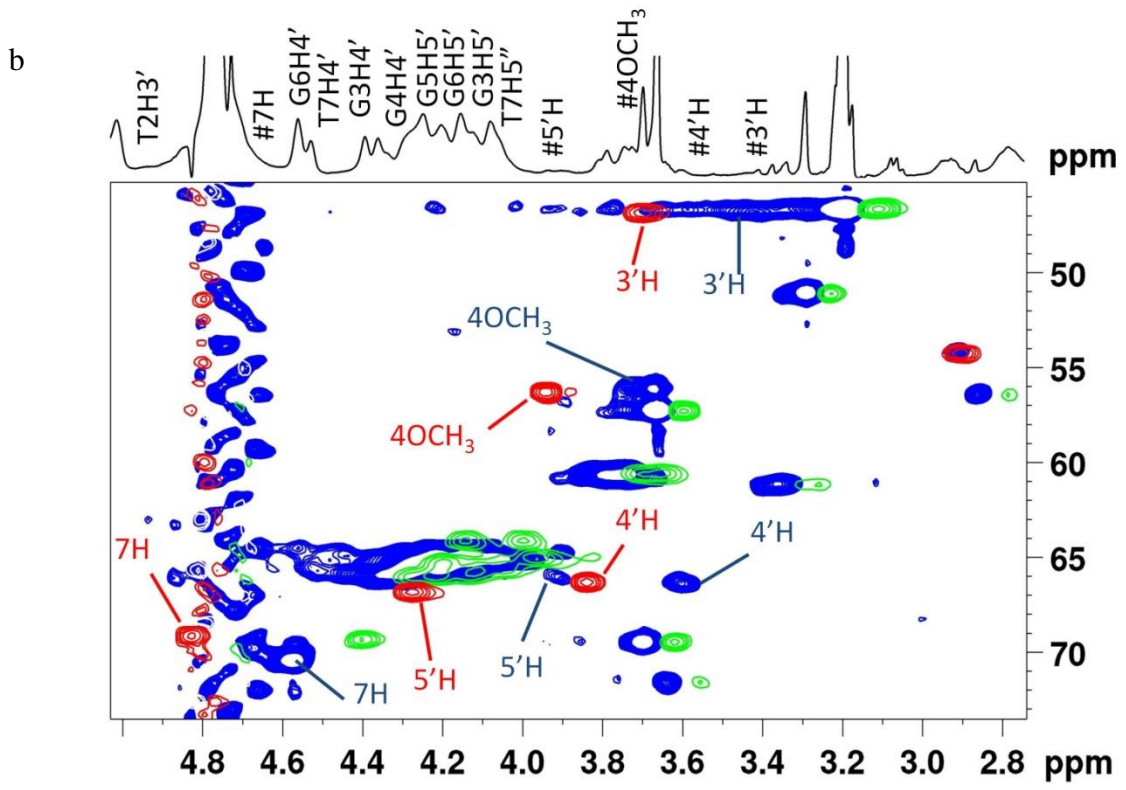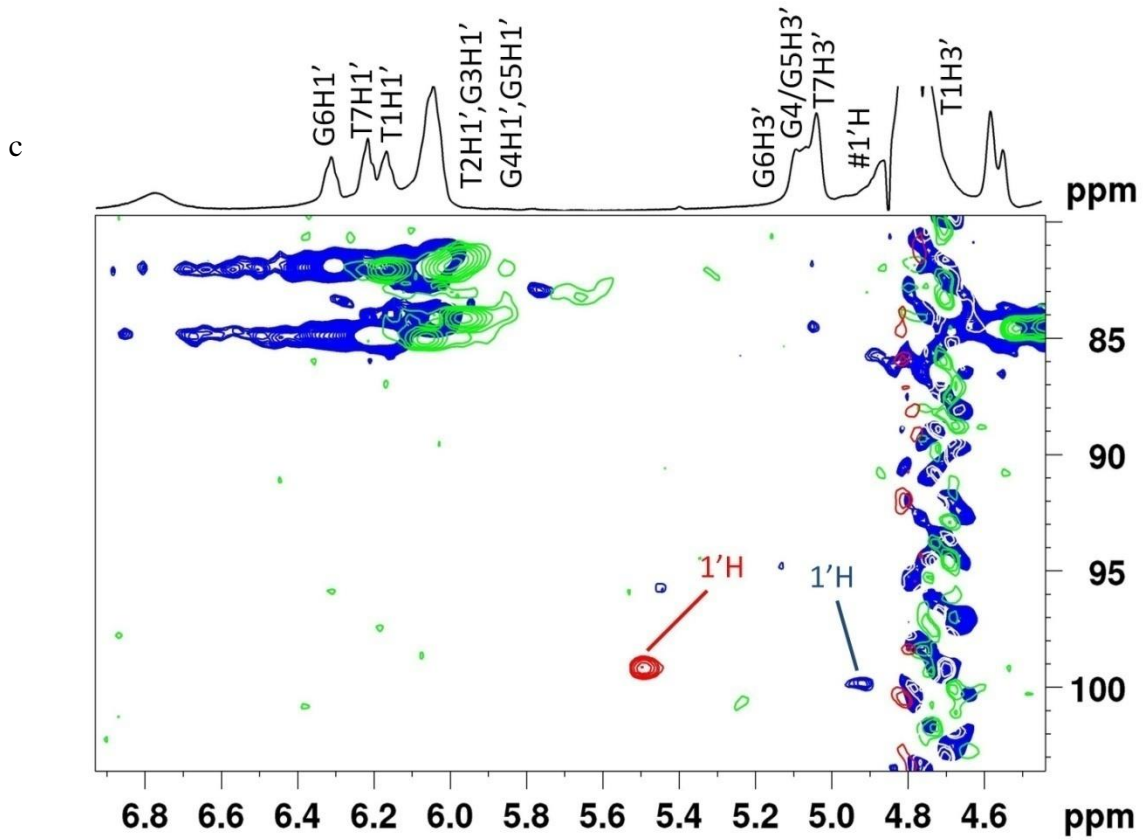

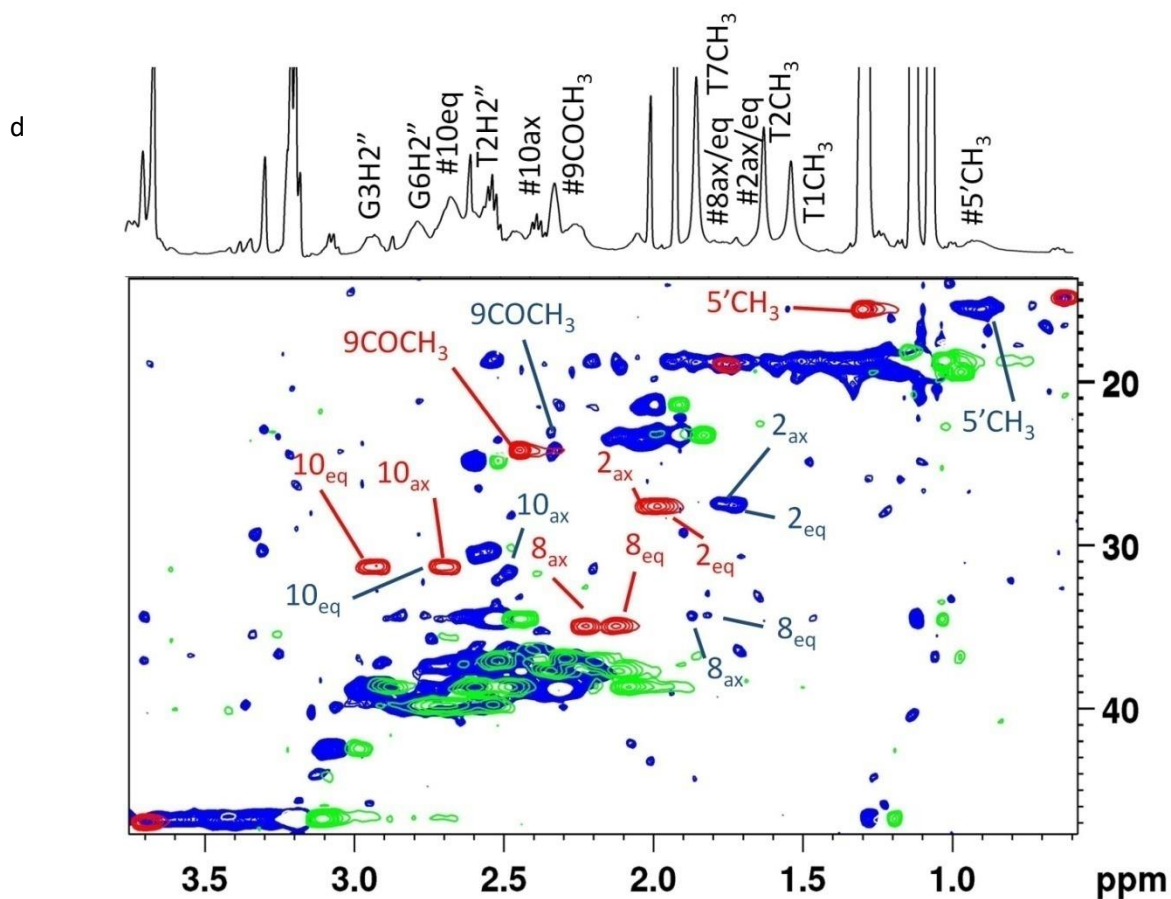

Figure S4 (a,d) Expansion of specific region of 2D  $^1\text{H}$ - $^{13}\text{C}$  HSQC spectrum showing overlay of free daunomycin (red), free  $[\text{d}-(\text{TTGGGGT})_4]$  (green) and daunomycin- $[\text{d}-(\text{TTGGGGT})_4]$  complex at  $D/N = 2.0$  (blue) in KBPES buffer (90%  $\text{H}_2\text{O}$  + 10%  $\text{D}_2\text{O}$ ) at 25 °C. 1D  $^1\text{H}$  NMR spectrum at the top of HSQC spectra is daunomycin-DNA  $[\text{d}-(\text{TTGGGGT})_4]$  complex at  $D/N = 2.0$ .

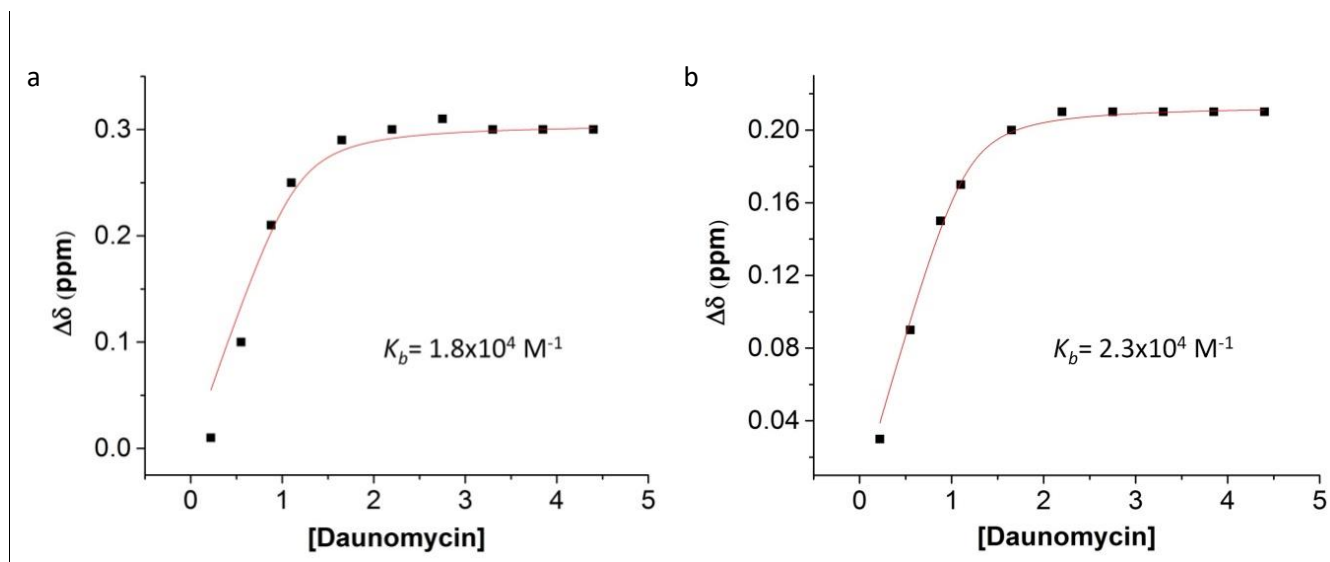

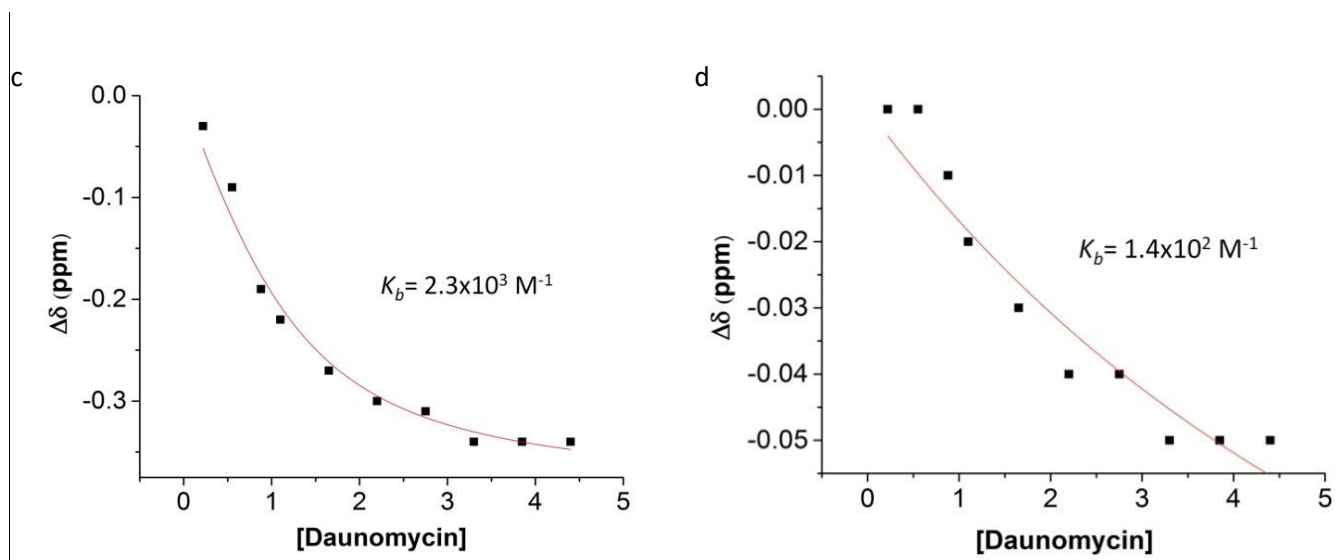

Figure S5 Nonlinear fitted curve (red) for simultaneous binding at two different sites in daunomycin-[d(TTGGGGT)]<sub>4</sub> complex of protons (a) T7H6, (b) T7CH<sub>3</sub>, (c) G6NH and (d) T1CH<sub>3</sub>. Plot shows change in chemical shift ( $\Delta\delta$ ) of protons at D/N = 0.2–4.0 as a function of daunomycin concentration ( $\mu\text{M}$ ) showing binding constants ( $K_b$ ) at 25 °C.

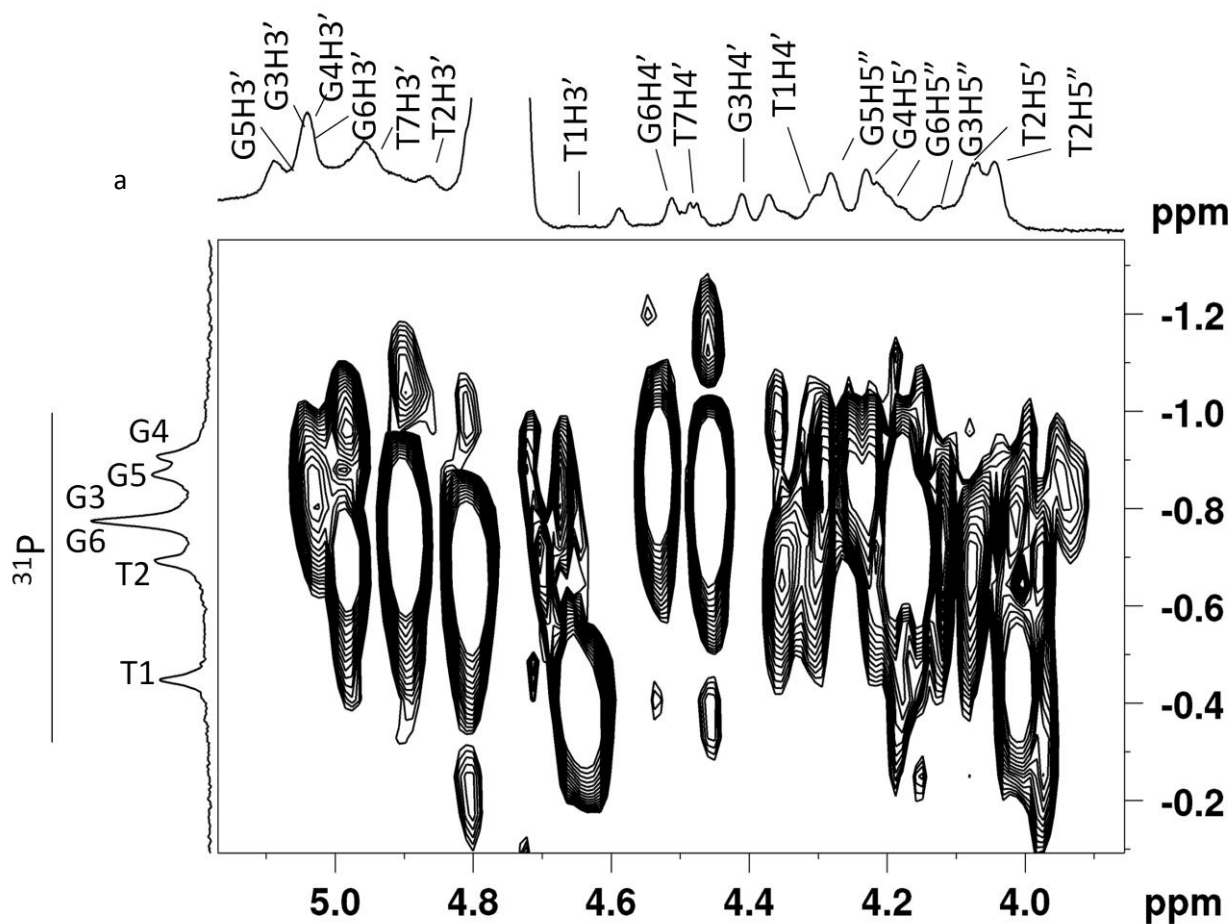

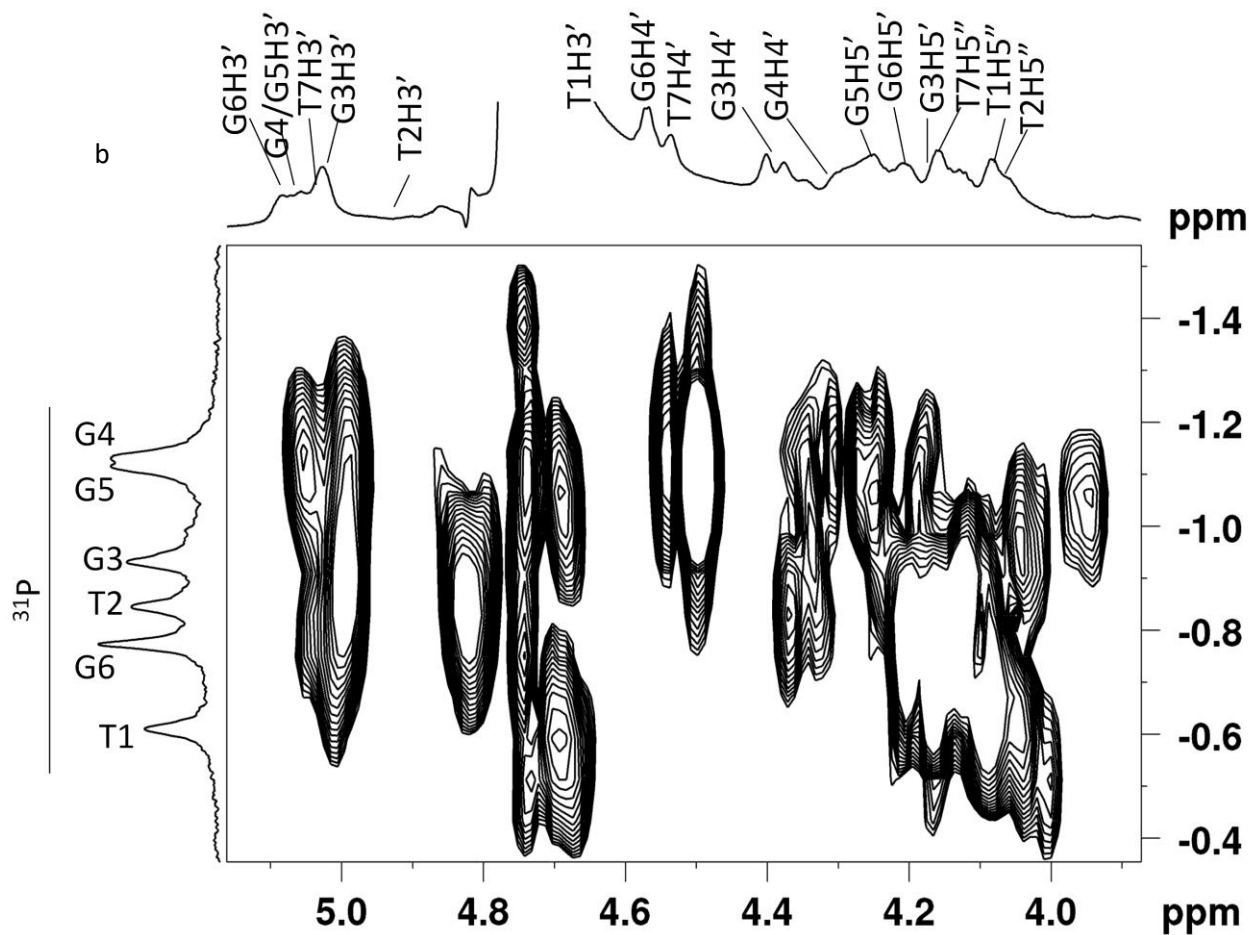

Figure S6: 2D  $^1\text{H}$ - $^{31}\text{P}$  HMBC spectra of a) free [d-(TTGGGGT)]<sub>4</sub> and b) daunomycin-[d-(TTGGGGT)]<sub>4</sub> complex at D/N = 2.0 complex in KBPES buffer (90% H<sub>2</sub>O+10% D<sub>2</sub>O) at 25 °C.

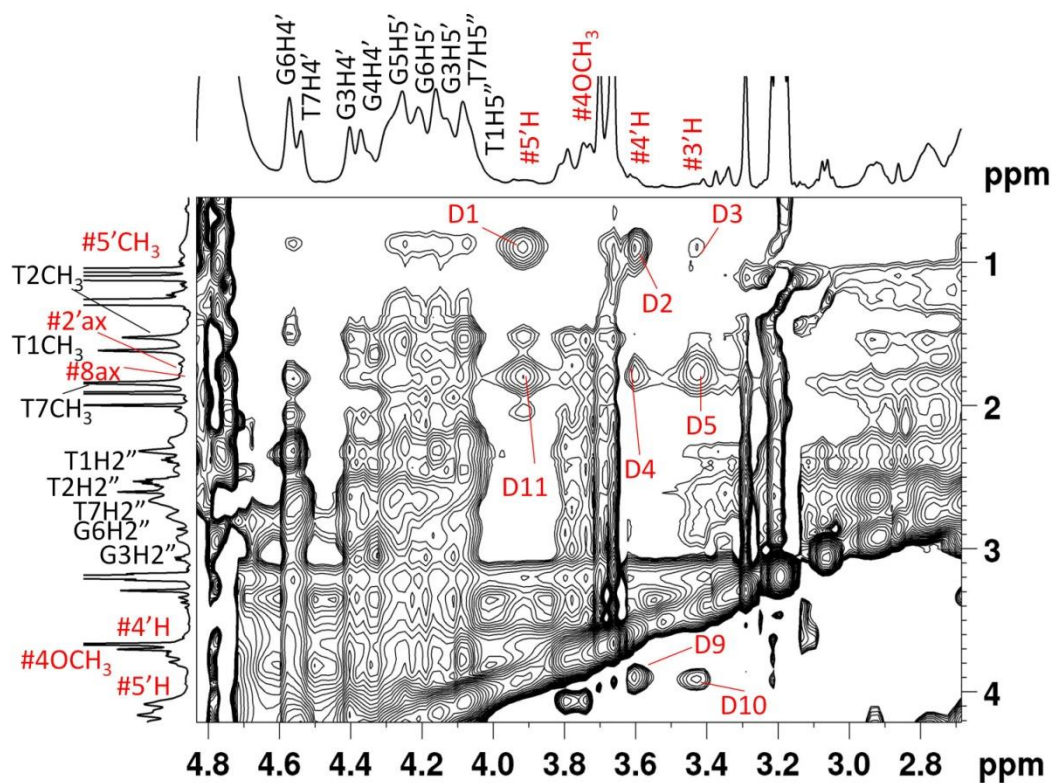

Figure S7: 2D  $^1\text{H}$ - $^1\text{H}$  NOESY spectra of daunomycin-[d-(TTGGGGT)]<sub>4</sub> complex at D/N = 2.0, mixing time ( $\tau_m$ ) = 250 ms at 25 °C. Expansion of specific region of NOESY spectra showing intra molecular NOE correlations between daunomycin protons 5'CH<sub>3</sub>, 3'H, 4'H, 5'H, 2'<sub>ax</sub>, and 8'<sub>ax</sub>. Symbol # denotes daunomycin protons, D denote intra molecular daunomycin cross peaks (numbering of D done as per Table S3).

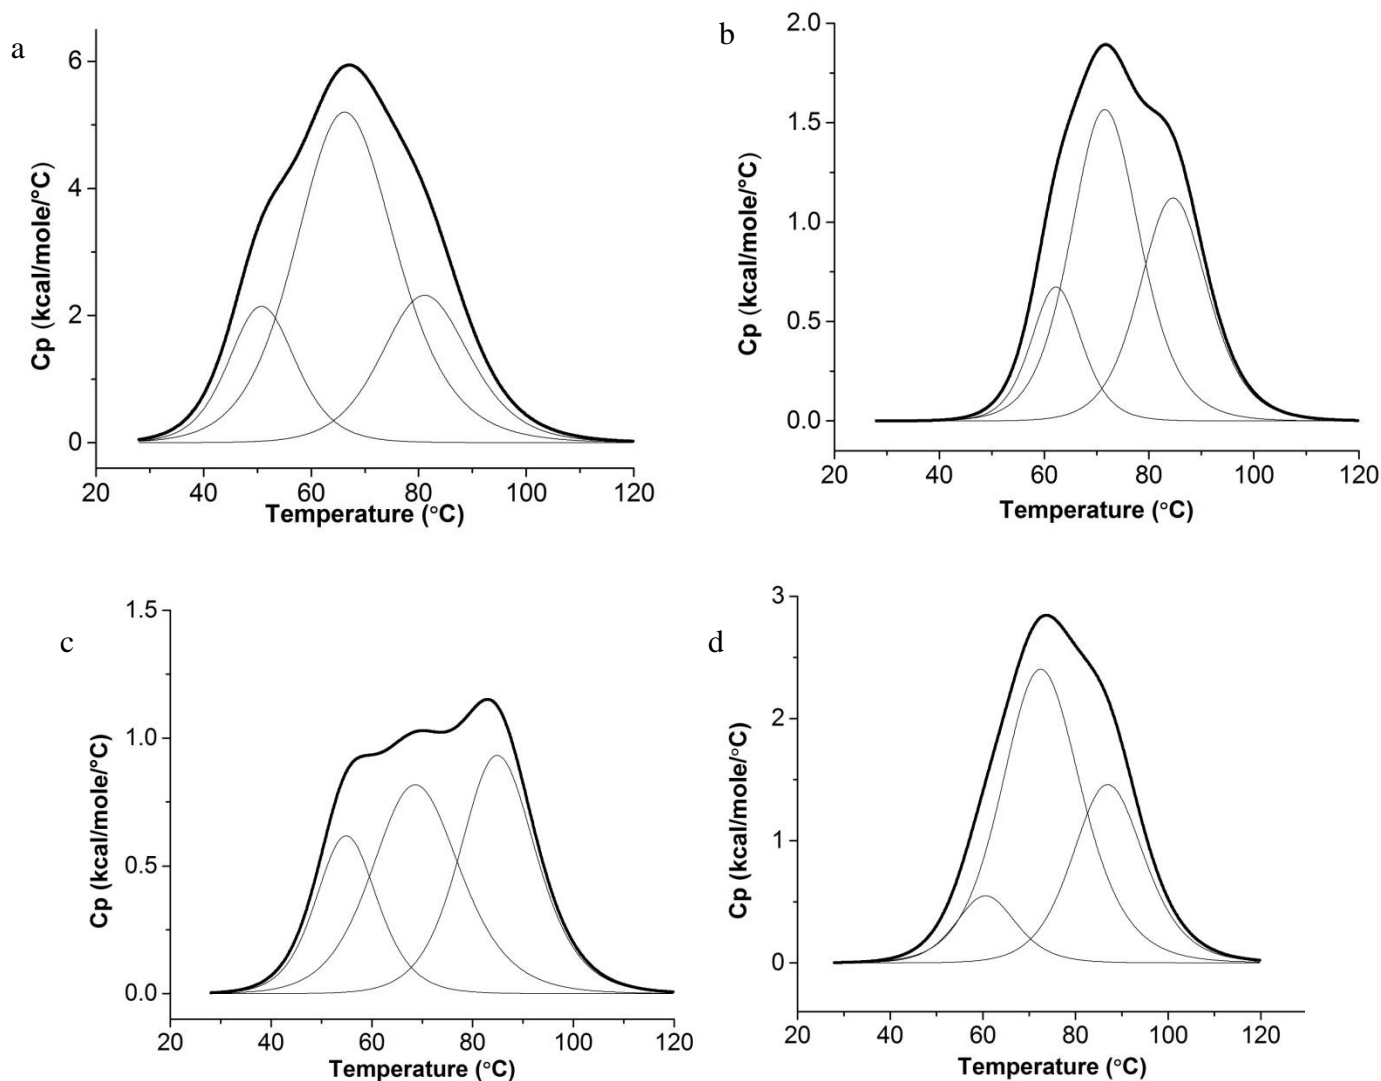

Figure S8: Differential Scanning Calorimetry (DSC) thermograms showing excess heat capacity as a function of temperature for daunomycin-[d-(TTGGGGT)]<sub>4</sub> complex at a-d) D/N = 0.5, 1.0, 3.0 and 4.0. All samples were prepared in phosphate buffer (KBPES) (pH 7.0) containing 100 mM KCl.
